1 **Use of routine health data to monitor malaria intervention effectiveness:**  
2 **a scoping review**

3

4 Richard Reithinger,<sup>1</sup> Donal Bisanzio,<sup>1,2</sup> Anya Cushnie,<sup>3</sup> Jessica Craig<sup>1</sup>

5

6 <sup>1</sup> Country Health Information System and Data Use Program, RTI International, Washington, D.C.

7 <sup>2</sup> School of Medicine, Nottingham University, Nottingham, United Kingdom

8 <sup>3</sup> Country Health Information System and Data Use Program, John Snow Inc., Washington, D.C.

9

10 **Correspondence**

11 Dr. Richard Reithinger; Email: [reithinger@yahoo.co.uk](mailto:reithinger@yahoo.co.uk)

12

13 **Article Summary Line**

14 Monitoring malaria intervention effectiveness

15

16 **Keywords (6)**

17 Malaria; intervention; effectiveness; routine; health information; review

18

19 **ABSTRACT**

20 The expansive scale-up of malaria interventions has contributed to substantial reductions in malaria morbidity  
21 and mortality in the past 15–20 years. The effectiveness of these interventions has traditionally been estimated  
22 through research studies and trials, nationally representative surveys, and mathematical modelling. Because of  
23 their sheer volume across space and time, programmatic data collected and reported routinely through health  
24 management information systems (HMIS) can complement and even offer an alternative to nationally  
25 representative and other ad hoc surveys to assess health intervention effectiveness, and ultimately impact on  
26 health outcomes. The objective of this scoping review was to describe the different analytical approaches for  
27 estimating the impact and effectiveness of malaria interventions using routine HMIS and surveillance data.

28 We examined PubMed using combination searches of the following terms: “malaria” AND “intervention” AND  
29 “effect\*” OR “impact” AND “system” OR “surveillance”. We limited inclusion to studies and analyses that were  
30 conducted in the past decade. We purposefully chose this time cut-off, as that is when countries’ routine HMIS  
31 began to substantially mature, with data reported by these systems progressively becoming more robust. Out of  
32 957 records generated from the PubMed search, following title and abstract screening, 93 were included for full-  
33 text review, with 49 records ultimately meeting the inclusion criteria and being included in the scoping review.

34 We summarize included studies by publication year, geography, outcome variables, target populations,  
35 interventions assessed, HMIS data platform used—we show that analytical approaches used a range of modelling  
36 and non-modelling approaches to assess intervention effectiveness.

37 This scoping review shows that routine HMIS data can also be used to regularly assess the effectiveness of  
38 various malaria interventions—an important exercise to ensure that implemented malaria interventions continue  
39 to be effective, have the desired effect, and ultimately help countries progress towards their national strategic  
40 goals and targets.

### **Strengths and Limitations of this Study**

- ▶ This scoping review describes the different analytical approaches for estimating the impact and effectiveness of malaria interventions using routine health management information system (HMIS) and surveillance data.
- ▶ A range of analytical approaches to assess malaria intervention effectiveness using routine HMIS and surveillance data were identified in the records (studies) reviewed, which broadly can be categorized into modelling and non-modelling approaches.
- ▶ Limitations lie in the inclusion criteria and main literature database used for the review: some papers and grey literature may not have been included, as well as papers in languages other than English may have been missed.

41

## 42 BACKGROUND

43 Malaria is an acute febrile illness caused by a parasitic infection transmitted by *Anopheles* mosquitoes.  
44 Human malaria is caused by five different *Plasmodium* parasites, with *P. falciparum* being the predominant  
45 species in sub-Saharan Africa (SSA).[1] In the past 15–20 years, the combined efforts of Ministries of Health  
46 (MOHs) and National Malaria Programs (NMPs), and their partners, have made tremendous progress against  
47 malaria. Thus, in 2022, the estimated global malaria incidence was 58.43 per 1,000 people at risk, a 25%  
48 reduction since 2002; similarly, in the same time period, malaria mortality rates have decreased by nearly 50% to  
49 14.82 per 100,000 people in 2021.[2] This progress resulted from the massive scale-up of various malaria  
50 prevention and control interventions, including facility and community-based confirmatory testing and treatment  
51 of malaria cases, intermittent preventive treatment during pregnancy (IPTp), and seasonal malaria  
52 chemoprevention (SMC), along with indoor residual spraying of households with insecticide (IRS) and  
53 insecticide-treated nets (ITNs).[1–3]

54 MOH / NMPs use programmatic intervention coverage and effectiveness data to regularly monitor  
55 impact of interventions, modify intervention implementation approaches (e.g., if coverage estimates are sub-par),  
56 or switch interventions altogether (e.g., when the effectiveness of an intervention is observed to be lower than  
57 expected or waning). Intervention coverage and effectiveness has traditionally been assessed by post-  
58 intervention campaign surveys (e.g., post-ITN distribution campaign surveys),[4–6] periodic nationally  
59 representative surveys (e.g., Demographic and Health Surveys [DHS], Malaria Indicator Surveys [MIS],  
60 Multiple Indicator Cluster Surveys [MICS]),[7–10] or estimated by complex mathematical modelling.[11, 12]  
61 While these approaches are generally robust, they have limitations. For example, nationally-representative  
62 surveys only occur every 2–5 years; take time; require significant human, logistical and financial resources, and  
63 capabilities; and may not be powered sufficiently to provide sub-national intervention estimates. Similarly,  
64 mathematical modelling may be limited by the available data and the significant technical expertise needed to  
65 develop and run the models, let alone run them continuously. Additionally, neither surveys nor modelling may  
66 avail necessary estimates at key strategic moments in the malaria programming planning, implementation, and  
67 monitoring cycle, such as the development of key national strategies or design of necessary donor documents  
68 (e.g., national malaria strategic plans, Global Fund to Fight AIDS, Tuberculosis and Malaria Concept Notes or  
69 U.S. President’s Malaria Initiative Malaria Operational Plans).

70 Countries’ national health management information systems (HMIS) have been dramatically  
71 strengthened in the past decade,[13] with countries being able to consistently and fully report on outpatient,  
72 inpatient and other programmatic data—much of this progress has been made following the wide adoption,  
73 piloting and roll out of the district health management information system 2 (DHIS2), an open-source data-  
74 system software specifically developed to capture health data in lower-and-middle income countries.[14]  
75 Because of their sheer volume across space and time, data collected and reported through HMIS like DHIS2 can  
76 complement and even offer an alternative to nationally representative and other ad hoc surveys to assess health  
77 intervention coverage and effectiveness, and ultimately impact on health outcomes.[15–17]

78 The objective of this scoping review was to describe the different analytical approaches for estimating  
79 the impact and effectiveness of malaria interventions using routine HMIS and surveillance data. To our

80 knowledge, such a review has not been conducted. A preliminary search for existing scoping and systematic  
81 reviews on the topic was conducted on December 15, 2023, using PubMed, and no similar reviews were found.

82

### 83 **MATERIALS & METHODS**

84 To conduct and report this scoping review, we followed the PRISMA-ScR (Preferred Reporting Items for  
85 Systematic Reviews and Meta-Analysis extension for Scoping Reviews) (**S1 File: PRISMA-ScR  
86 Checklist**).[18]. The detailed published protocol is available on Protocol.io [19].

87 A systematic search of PubMed was conducted on January 2, 2024, to identify studies and analyses that  
88 had used routine surveillance and HMIS data to assess the effectiveness of malaria interventions. A detailed  
89 search strategy was designed and piloted to identify the optimal combination of keywords used. We examined  
90 PubMed using combination searches of the following terms: “malaria” AND “intervention” AND “effect\*” OR  
91 “impact” AND “system” OR “surveillance”. Other key terms such as “routine” or “information systems” were  
92 not included in the search strategy to have a more comprehensive initial search and were used during abstract  
93 and full text screening. All identified studies were imported into Rayyan, a systematic review management  
94 software, to screen (title, abstract, and full text) and manage the results of the search.[20]

95 The first stage of the review involved two reviewers (JC, RR) independently identifying potentially  
96 relevant articles based on information provided in the title and abstract. Inclusion criteria were: (1) they  
97 addressed malaria, and (2) described an approach using routine HMIS and surveillance data to evaluate the  
98 effectiveness of a malaria intervention. Articles were also included if the information provided in the title and  
99 abstract was not sufficient to determine if it met the inclusion criteria (i.e., it was tagged as “Maybe” in the  
100 Rayyan database). In the event of discordance between the two reviewers (e.g., “Included” / “Excluded” and  
101 “Excluded” / “Maybe” tag dyad), a third reviewer (DB) reviewed the titles and abstracts and came to a final  
102 decision (i.e., “Included”, “Excluded”, “Maybe”).

103 The second stage of the review involved at least two of the three reviewers independently reviewing  
104 articles’ full text and determining which publications were relevant to the current review. We limited inclusion to  
105 studies and analyses that were conducted in the past decade (i.e., the study publication date had to be 2014  
106 onwards, with the study period having to include 2013 at the least). We purposefully chose this time cut-off, as  
107 that is the time point when countries’ routine HMIS began to substantially mature, with data reported by these  
108 systems progressively becoming more robust.[13]

109 From the included articles, one reviewer (RR) extracted the data from the articles into a pre-specified  
110 MS Excel spreadsheet, specifying the following data elements: (1) author; (2) year of publication; (3) geography;  
111 (4) study design; (5) study or time period covered; (6) intervention(s) for which effectiveness and impact was  
112 measured; (7) approach to measure effectiveness and impact; (8) health information system platform used for the  
113 analyses; (9) indicator variables included in the analyses; (10) target population; (11) key findings; and (12)  
114 items from the Template for Intervention Description and Replication (TIDieR) checklist. TIDieR is a 12-item  
115 checklist that includes the brief name, why, what (materials), what (procedure), who provided, how, where,  
116 when and how much, tailoring, modifications, how well (planned), how well (actual) of a program.[21]

117

## 118 **RESULTS**

119 The PubMed search generated 912 records. Following title and abstract screening, 93 were included for full-text  
120 review, with 49 records ultimately meeting the inclusion criteria and being included in the scoping review  
121 (**Figure 1**).[22–70] A complete list of all screened records can be found as a supplementary file (**S2 File:  
122 Complete Data File**). Main characteristics of the included records (studies) are summarized in **Table 1**. All  
123 articles were published in English from 2014–2024.

124 **Publication year.** Of the 49 included studies that were conducted between 2013 and 2023, 35 (71.4%) were  
125 published between 2020 and 2024; most studies were published in 2022 (n = 11) and 2020 (n = 10).

126 **Geography.** The 49 studies included in the scoping review were conducted in 23 countries; one multi-country  
127 study was conducted in five countries.[41] Of included studies, 40 (81.6%) were conducted in Africa, compared  
128 to seven (14.3%) and two (4.1%) in Asia and Latin America and the Caribbean, respectively. Countries in which  
129 more than three studies were conducted included Uganda (n = 9), Zambia (n = 5), and Mali (n = 4).

130 **Outcome Variables.** Studies included in the scoping review used a range of malariometric outcome indicators,  
131 with the majority (n = 36, 73.5%) using either the number of confirmed uncomplicated malaria cases or  
132 uncomplicated malaria case incidence (usually defined as 1,000 per population). Many studies included more  
133 than just a single outcome indicator in their analyses. Other indicators used in the studies included clinical or  
134 suspected malaria, malaria test positivity rate, hospitalizations, deaths, and low birth weight.

135 **Target populations.** Generally, interventions' effectiveness was assessed for the entire population (n = 23),  
136 children under five years of age (n = 8), pregnant women (n = 4); or other specific age groups (e.g., children  
137 under 10 years of age, people over five years of age) (n = 4); ten studies included analyses on two or more age  
138 groups.

139 **Interventions evaluated.** Interventions, whose effectiveness was assessed included ITNs and/or IRS (n = 18  
140 [36.7%]), diagnosis and/or treatment (n = 12 [24.5%]), SMC (n = 7 [14.3%]), IPTp or intermittent preventive  
141 treatment in children (n = 3 [6.1%]), mass drug administration (n = 3 [6.1%]), and some form of active and  
142 responsive surveillance (n = 2 [4.1%]). Of the 49 studies included, four assessed the effectiveness of integrated,  
143 complementary interventions (e.g., artemisinin-based combination therapies [ACT] and ITNs, or SMC and IRS).

144 **HMIS data platform used.** All studies included in the scoping review used routine HMIS data, some in  
145 combination with other data sources (e.g., cross-sectional community and household surveys) (n = 5). Of  
146 included studies, 20 (40.8%) specifically stated using the DHIS2 platform, and nine (18.4%) used facility  
147 registries (e.g., for antenatal care, outpatients, or inpatients).

148 **Analytical Methods.** Modelling approaches were used in 35 (71.4%) studies to estimate interventions'  
149 effectiveness, including regression models (n = 18), interrupted time series models (n = 12), or Bayesian spatio-  
150 temporal models (n = 5). In the remaining 14 studies, non-modelling approaches were used, including  
151 comparisons of incidence trends (n = 8), rate ratios (n = 3), difference-in-difference analysis (n = 1), and the  
152 compound annual growth rate (n = 1). No study was found comparing modelling and non-modelling approaches.

153 **Collaborative in-country partnership.** Of the 49 studies included in the scoping review, 46 (94%) had co-  
154 authors affiliated with in-country institutions, notably the MOH or NMP (n = 31), and/or academic research  
155 institutions (n = 24). Three studies did not have a co-author affiliated with MOH, NMP, or local academic  
156 research institutions.[36]

157

## 158 **DISCUSSION**

159 As support for malaria control and elimination continues, and additional malaria interventions are introduced  
160 (e.g., vaccines, spatial repellents),[1–3] alternative methods for measuring intervention effectiveness and impact  
161 must be explored. Controlled and observational research studies or nationally representative surveys to  
162 investigate intervention coverage and effectiveness at scale are resource-intensive and costly. Similarly,  
163 modelling efforts are complex—they usually require specific types of data and a substantial level of technical  
164 expertise, which may not always be available at country level. Following substantial investments by country  
165 governments and external assistance partners such as the Global Fund to Fight AIDS, Tuberculosis and Malaria,  
166 the U.S. President’s Malaria Initiative, and GAVI, countries’ HMIS have strengthened considerably over the past  
167 decade.[13] There is an increasing acknowledgement that routinely (passively) collected data can not only be  
168 used to monitor malariometric trends, but can also be used to assess the impact of malaria interventions, and that  
169 such an approach—in complement to surveys and modelling—represents a great opportunity to substantially  
170 inform programmatic decision-making.[70–74] Moreover, such approach can also be seen as more representative  
171 of the true effect and impact of an intervention within a programmatic context rather than the testing and  
172 monitoring of intervention effectiveness in a gold-standard, resource-intensive and rich environment (e.g.,  
173 randomized controlled trials). This change in thinking is reflected in the increasing number of studies conducted  
174 and published in the last 3 years that used routine HMIS data to assess the effectiveness of malaria interventions  
175 (i.e., of the 49 studies included in our review, 35 [71.4%] were published between 2020–2024). Using routine  
176 HMIS data—whether from health facility registries or monthly aggregate, facility- or district-level DHIS2  
177 data—we show that countries can estimate the programmatic impact of most commonly-implemented malaria  
178 interventions across facilities, districts, provinces or regions, and at national levels.

179 For routine HMIS data to be successfully used to assess malaria intervention effectiveness, several pre-  
180 requisites need to be in place. First, for countries to be able to use routine HMIS data for such purpose, available  
181 data needs to originate from the majority of health service delivery points (i.e., from community-level to tertiary  
182 health facilities), as well as be complete, up-to-date and timely, and of high quality.[75] Second, ideally,  
183 interventions for which effectiveness is assessed should have high programmatic coverage and be deployed or  
184 implemented at a high-quality standard (e.g., SMC- eligible children should receive all preventive treatment  
185 doses to protect them from malaria throughout the entire malaria transmission season). Third, the data for all  
186 outcome indicators should be robust (e.g., if reported confirmed malaria case incidence is used as outcome  
187 indicator, all suspected clinical malaria cases should be tested and confirmed, as otherwise the data will not be a  
188 robust representation of malaria trends in a given geographic area). Fourth, efforts to estimate intervention  
189 effectiveness using routine HMIS data should be cognizant of possible confounding variables. Thus, if there are  
190 geographic variances in the proportion of the population accessing health services (e.g., due to physical distance,  
191 commodity stock-outs or disasters), or accessing health services in the public versus private sector in areas where

192 a specific intervention is being implemented, outcome indicator data may under- or over-estimate the  
193 effectiveness of the intervention. Similarly, if there are geographic and temporal variances of rainfall and  
194 temperature between intervention and non-intervention areas, transmission as well as intervention coverage and  
195 use may be impacted—again, under- or over-estimating the implemented interventions’ effectiveness.  
196 Consequently, analytical approaches should adjust for these confounders or at least fully address these in the  
197 interpretation of the analyses’ findings.

198 As shown in our scoping review, studies using routine HMIS data to assess intervention effectiveness  
199 have been conducted for all main malaria interventions, i.e., for case management, preventive chemotherapy,  
200 vector control, or surveillance (**Table 1**). For example, several studies showed the impact of vector control,  
201 specifically IRS, in reducing malaria case incidence by 16% in moderate transmission districts in Mali [50] to  
202 85% in high-transmission districts in Uganda [52]. Several studies assessed the impact of SMC in children,  
203 showing reductions of 10–55%, 27–51% and 56–67% in uncomplicated malaria case incidence, hospital  
204 admissions, and malaria-related deaths, respectively.[36–41] Similarly, several studies showed how the  
205 introduction of community health workers and community case management lead to a reduction in malaria  
206 incidence,[26, 27] severe malaria admissions,[31] and malaria-related deaths.[31] Importantly, analyses using  
207 routine HMIS data also showed the changes in epidemiological trends when intervention are waning or are being  
208 discontinued. Thus, in a study in the Burundian highlands, a decline of malaria incidence was noted 20 to 40  
209 weeks after a national mass ITN distribution campaign; yet, from week 80 post-ITN distribution onwards,  
210 malaria incidence had rebounded to levels higher than before the intervention.[55] In Uganda, discontinuation of  
211 IRS was associated with a 5-fold increase in malaria case incidence within 10 months; subsequent reinstating of  
212 IRS was associated with an over 5-fold decrease within 8 months.[53] In Mali, discontinuation of IRS resulted in  
213 a 70% increase in malaria case incidence, compared to areas where IRS was continued and malaria case  
214 incidence remained the same.[50].

215 As reported in our scoping review, different analytical approaches have been applied to estimate  
216 interventions’ effectiveness from routine HMIS and surveillance data, which broadly can be categorized into  
217 modelling and non-modelling approaches. While the former is inherently more robust, as analyses can be  
218 adjusted for covariates and confounding variables, they can be complex as requiring a certain level of expertise  
219 and specific types of data—ultimately, this also could hamper the approaches’ routine and long-term adoption  
220 and use by in-country malaria policymakers and stakeholders. While not having the same level of robustness,  
221 non-modelling analytical approaches are simpler to conduct and more readily communicated to and ultimately  
222 applied and used by policymakers and stakeholders (e.g., because the approaches are often algebra based, they  
223 do not require advanced data analytics or modelling expertise, and thus can be routinely applied by programme  
224 personnel with a basic understanding of algebra)—a crucial element in changing a countries’ data analysis and  
225 use culture.[75] Interestingly, we found no study that specifically compared different sets of analytical  
226 approaches (e.g., modelling vs non-modelling approaches; regression vs Bayesian spatio-temporal models).  
227 Ultimately, deciding on which analytical approach to use to assess interventions’ effectiveness will depend on  
228 the body of data available for the analyses, the level of robustness and reproducibility required, the skills and  
229 expertise available to conduct the analyses, software and computing requirements, and needs for capacity  
230 transferability and sustainability (**Table 2**).



231 This scoping review has several potential limitations. First, we only searched one database (i.e.,  
232 PubMed), and some relevant studies may have been excluded. To mitigate against this, we used broad literature  
233 database search terms, which resulted in the identification of over 900 records for title and abstract screening.  
234 Second, scoping reviews are exploratory in nature and are meant to address broad questions—such as whether  
235 routine HMIS data have been used to estimate malaria interventions’ effectiveness. Although the scope was  
236 wide, it is evident and clear from this scoping review that this topic is an area of increased interest for  
237 researchers and policy makers as they are contemplating the most effective combination of malaria interventions  
238 to use when, where and at what scale, in a context of increasingly constrained resources.[76] Third, we restricted  
239 interventions as tools and approaches that public health practitioners deploy and implement to reduce the malaria  
240 burden, rather than using an even broader definition of intervention (e.g., intervention being any “outside event”  
241 affecting intervention effectiveness). For example, several studies assessed the impact of climate change [77–79]  
242 or even the recent COVID-19 pandemic [80–82] on malaria burden, which we excluded from our scoping  
243 review. Lastly, we did not assess the quality of the studies reported on in the records included in our review, with  
244 studies varying in their approach to measure intervention effectiveness, first-and-foremost using either modelling  
245 or non-modelling approaches. Parameters to assess the studies’ quality would have to be defined. Of interest  
246 could be a study comparing different analytical approaches, not only in terms of the outcome of the analyses  
247 (i.e., quantitative metrics of intervention effectiveness), but also resource requirements and programmatic  
248 decision-making outcome (i.e., would differences in the analyses’ outcomes have led to a different programmatic  
249 decision, such as continuing or discontinuing a specific intervention).

250

## 251 **CONCLUSION**

252 In its 2016–2030 Global Technical Strategy, WHO defines surveillance as a core intervention for malaria  
253 prevention and control, making it one of three pillars the strategy is built upon. A strong routine HMIS is critical  
254 for efficient and effective malaria surveillance in order to document and report on disease trends at national and  
255 subnational levels, both spatially and temporally. This in turn supports strategic and programmatic planning,  
256 including for targeting interventions geographically and epidemiologically, thereby optimizing and maximizing  
257 the public health impact of available operational, human, and financial resources. The effectiveness of malaria  
258 interventions has traditionally been estimated through research studies and trials, nationally representative  
259 surveys, and mathematical modelling. This scoping review shows that routine HMIS and surveillance data can  
260 also be used to regularly assess the effectiveness of various malaria interventions—an important exercise to  
261 ensure that implemented malaria interventions continue to be effective, have the desired effect, and ultimately  
262 help countries progress towards their national strategic goals and targets.

263

## 264 **Acknowledgements**

265 The findings and conclusions expressed herein are those of the authors and do not necessarily represent the  
266 official position of their employing organizations, the U.S. Agency for International Development, or the United  
267 States Government.

268

## 269 **Financial Support**

270 The work was performed with funding provided by the US President's Malaria Initiative via the U.S. Agency for  
271 International Development Country Health Information System and Data Use (CHISU) program (Cooperative  
272 Agreement #7200AA20CA00009).

273

## 274 **Conflict of Interest**

275 None to declare.

276

## 277 **Patient Statement**

278 Patients and/or the public were not involved in the design, or conduct, or reporting, or dissemination plans of this  
279 research.

280

281

## 282 **References**

- 283 1. Poespoprodjo JR, Douglas NM, Ansong D, Kho S, Anstey NM. Malaria. *Lancet* 2023; 402: 2328–2345.
- 284 2. World Health Organization (2023) World Malaria Report 2023. Geneva: WHO.  
285 <https://www.who.int/teams/global-malaria-programme/reports/world-malaria-report-2023> (accessed  
286 July 29, 2024)
- 287 3. World Health Organization (2021) Global technical strategy for malaria 2016–2030, 2021 update.  
288 Geneva: WHO. <https://www.who.int/publications-detail-redirect/9789240031357>. (accessed July 29,  
289 2024)
- 290 4. Zegers de Beyl C, Koenker H, Acosta A, Onyefunafao EO, Adegbe E, McCartney-Melstad A, Selby  
291 RA, Kilian A. Multi-country comparison of delivery strategies for mass campaigns to achieve universal  
292 coverage with insecticide-treated nets: what works best? *Malar J.* 2016; 15: 58.
- 293 5. Maiteki-Sebuguzi C, Gonahasa S, Kanya MR, Katureebe A, Bagala I, Lynd A, Mutungi P, Kigozi SP,  
294 Opigo J, Hemingway J, Dorsey G, Donnelly MJ, Staedke SG. Effect of long-lasting insecticidal nets  
295 with and without piperonyl butoxide on malaria indicators in Uganda (LLINEUP): final results of a  
296 cluster-randomised trial embedded in a national distribution campaign. *Lancet Infect Dis.* 2023; 23:  
297 247-258.
- 298 6. [to be added]
- 299 7. Jima D, Getachew A, Bilak H, Steketee RW, Emerson PM, Graves PM, Gebre T, Reithinger R, Hwang  
300 J; Ethiopia Malaria Indicator Survey Working Group. Malaria indicator survey 2007, Ethiopia:  
301 coverage and use of major malaria prevention and control interventions. *Malar J.* 2010; 9: 58.

- 302 8. Zamawe CO, Nakamura K, Shibanuma A, Jimba M. The effectiveness of a nationwide universal  
303 coverage campaign of insecticide-treated bed nets on childhood malaria in Malawi. *Malar J.* 2016; 15:  
304 505.
- 305 9. Kang SY, Battle KE, Gibson HS, Ratsimbao A, Randrianarivejosia M, Ramboarina S, Zimmerman  
306 PA, Weiss DJ, Cameron E, Gething PW, Howes RE. Spatio-temporal mapping of Madagascar's Malaria  
307 Indicator Survey results to assess *Plasmodium falciparum* endemicity trends between 2011 and 2016.  
308 *BMC Med.* 2018; 16: 71.
- 309 10. Alhassan Y, Dwomoh D, Amuasi SA, Nonvignon J, Bonful H, Tetteh M, Agyabeng K, Kotey M,  
310 Yawson AE, Bosomprah S. Impact of insecticide-treated nets and indoor residual spraying on self-  
311 reported malaria prevalence among women of reproductive age in Ghana: implication for malaria  
312 control and elimination. *Malar J.* 2022; 21: 120.
- 313 11. Ozodiegwu ID, Ambrose M, Galatas B, Runge M, Nandi A, Okuneye K, Dhanoa NP, Maikore I,  
314 Uhomoibhi P, Bever C, Noor A, Gerardin J. Application of mathematical modelling to inform national  
315 malaria intervention planning in Nigeria. *Malar J.* 2023; 22: 137.
- 316 12. Souleiman Y, Ismail L, Eftimie R. Modeling and investigating malaria *P. falciparum* and *P. vivax*  
317 infections: Application to Djibouti data. *Infect Dis Model.* 2024; 9: 1095–1116.
- 318 13. Koumamba AP, Bisvigou UJ, Ngougou EB, Diallo G. Health information systems in developing  
319 countries: case of African countries. *BMC Med Inform Decis Mak.* 2021; 21: 232.
- 320 14. DHIS2. <https://dhis2.org>
- 321 15. Mwinnyaa G, Hazel E, Maïga A, Amouzou A (2021) Estimating population-based coverage of  
322 reproductive, maternal, newborn, and child health (RMNCH) interventions from health management  
323 information systems: a comprehensive review. *BMC Health Serv Res.* 21( Suppl 2): 1083.
- 324 16. Epstein A, Namuganga JF, Kanya EV, Nankabirwa JI, Bhatt S, Rodriguez-Barraquer I, Staedke SG,  
325 Kanya MR, Dorsey G, Greenhouse B (2020) Estimating malaria incidence from routine health facility-  
326 based surveillance data in Uganda. *Malar J.* 19: 445.
- 327 17. Ashton RA, Bennett A, Yukich J, Bhattarai A, Keating J, Eisele TP (2017) Methodological  
328 Considerations for Use of Routine Health Information System Data to Evaluate Malaria Program  
329 Impact in an Era of Declining Malaria Transmission. *Am J Trop Med Hyg.* 97 (3\_Suppl): 46-57.
- 330 18. PRISMA [Internet]. [cited 2021 Dec 2]. Available from:  
331 <http://www.prismastatement.org/Extensions/ScopingReviews>
- 332 19. Craig J, Bisanzio D, Reithinger R (2024) Scoping Review: Analytical Approaches to Estimating  
333 Malaria Intervention Effectiveness and Impact. [https://protocols.io/view/scoping-review-analytical-  
334 approaches-to-estimating-c8nszvee.pdf](https://protocols.io/view/scoping-review-analytical-approaches-to-estimating-c8nszvee.pdf)
- 335 20. <https://www.rayyan.ai/>
- 336 21. Hoffmann TC, Glasziou PP, Boutron I, Milne R, Perera R, Moher D, et al. Better reporting of  
337 interventions: template for intervention description and replication (TIDieR) checklist and guide. *BMJ*  
338 2014; 348: g1687–g1687.
- 339 22. Brito M, Rufatto R, Brito-Sousa JD, Murta F, Sampaio V, Balieiro P, BaÃ-a-Silva D, Castro V, Alves  
340 B, Alencar A, Duparc S, Grewal Daumerie P, Borghini-Fuhrer I, Jambert E, Peterka C, Edilson Lima F  
341 Jr, Carvalho Maia L, Lucena Cruz C, Maciele B, Vasconcelos M, Machado M, Augusto Figueira E,

- 342 Alcirley Balieiro A, Batista Pereira D, Lacerda M. Operational effectiveness of tafenoquine and  
343 primaquine for the prevention of Plasmodium vivax recurrence in Brazil: a retrospective observational  
344 study. *Lancet Infect Dis.* 2024; 24: 629– 638.
- 345 23. Pradhan MM, Pradhan S, Dutta A, Shah NK, Valecha N, Joshi PL, Pradhan K, Grewal Daumerie P,  
346 Banerji J, Duparc S, Mendis K, Sharma SK, Murugasampillay S, Anvikar AR (2022) Impact of the  
347 malaria comprehensive case management programme in Odisha, India. *PLoS One* 2022; 17: e0265352
- 348 24. Pradhan S, Pradhan MM, Dutta A, Shah NK, Joshi PL, Pradhan K, Sharma SK, Grewal Daumerie P,  
349 Banerji J, Duparc S, Mendis K, Murugasampillay S, Valecha N, Anvikar AR (2019) Improved access to  
350 early diagnosis and complete treatment of malaria in Odisha, India. *PLoS One* 2019; 14: e0208943
- 351 25. Linn NYY and Kathirvel S and Das M and Thapa B and Rahman MM and Maung TM and Kyaw AMM  
352 and Thi A and Lin Z (2018) Are village health volunteers as good as basic health staffs in providing  
353 malaria care? A country wide analysis from Myanmar, 2015. *Malaria J.* 2018; 17: 242.
- 354 26. McLean ARD and Wai HP and Thu AM and Khant ZS and Indrasuta C and Ashley EA and Kyaw TT  
355 and Day NPJ and Dondorp A and White NJ and Smithuis FM. Malaria elimination in remote  
356 communities requires integration of malaria control activities into general health care: an observational  
357 study and interrupted time series analysis in Myanmar. *BMC Medicine* 2018; 16: 183.
- 358 27. Zaw AS and Win ESS and Yan SW and Thein KS and Verma V and McLean ARD and Kyaw TT and  
359 White NJ and Smithuis FM. Successful elimination of falciparum malaria following the introduction of  
360 community-based health workers in Eastern Myanmar: A retrospective analysis. *PLoS Medicine* 2023;  
361 20: e1004318.
- 362 28. Bhavnani D and García Espinosa B and Baird M and Presley N and Le Menach A and Bradley C and  
363 Outten M and González O. Malaria surveillance and case management in remote and indigenous  
364 communities of Panama: results from a community-based health worker pilot. *Malaria J* 2022; 21: 297.
- 365 29. Uwimana A and Penkunas MJ and Nisingizwe MP and Uyizeye D and Hakizimana D and  
366 Musanabaganwa C and Musabyimana JP and Ngwije A and Turate I and Mbituyumuremyi A and  
367 Murindahabi M and Condo J. Expanding home-based management of malaria to all age groups in  
368 Rwanda: analysis of acceptability and facility-level time-series data. *Trans R Trop Med Hyg* 2018; 112:  
369 513–521.
- 370 30. Boyce RM and Muiru A and Reyes R and Ntaro M and Mulogo E and Matte M and Siedner MJ. Impact  
371 of rapid diagnostic tests for the diagnosis and treatment of malaria at a peripheral health facility in  
372 Western Uganda: an interrupted time series analysis. *Malaria J* 2015; 14: 203.
- 373 31. Ashton RA, Hamainza B, Lungu C, Rutagwera MI, Porter T, Bennett A, Hainsworth M, Burnett S,  
374 Silumbe K, Slater H, Eisele TP, Miller JM (2023) Effectiveness of community case management of  
375 malaria on severe malaria and inpatient malaria deaths in Zambia: a dose-response study using routine  
376 health information system data. *Malaria J* 2023; 22: 96.
- 377 32. Green C, Quigley P, Kureya T, Barber C, Chizema E, Moonga H, Chanda E, Simfukwe V, Mpande B,  
378 Simuyuni D, Mubuyaeta K, Hugo P, van der Weije K. Use of rectal artesunate for severe malaria at the  
379 community level, Zambia. *Bull WHO* 2019; 97: 810–817.

- 380 33. Coldiron ME, Lasry E, Bouhenia M, Das D, Okui P, Nyehangane D, Mwangi J, Langendorf C, Elder  
381 G, Salumu L, Grais RF. Intermittent preventive treatment for malaria among children in a refugee camp  
382 in Northern Uganda: lessons learned. *Malaria J* 2017; 16: 218.
- 383 34. Kamau A, Musau M, Mwakio S, Amadi D, Nyaguara A, Bejon P, Seale AC, Berkley JA, Snow RW.  
384 Impact of Intermittent Presumptive Treatment for Malaria in Pregnancy on Hospital Birth Outcomes on  
385 the Kenyan Coast. *Clin Infect Dis* 2022; 76: e875–e883.
- 386 35. Fraser M and Miller JM and Silumbe K and Hainsworth M and Mudenda M and Hamainza B and  
387 Moonga H and Chizema Kawesha E and Mercer LD and Bennett A and Schneider K and Slater HC and  
388 Eisele TP and Guinovart C. Evaluating the Impact of Programmatic Mass Drug Administration for  
389 Malaria in Zambia Using Routine Incidence Data. *J Infect Dis* 2022; 225: 1415–1423.
- 390 36. Kirakoya-Samadoulougou F, De Brouwere V, Fokam AF, Ouedraogo M, Ye Y. Assessing the effect of  
391 seasonal malaria chemoprevention on malaria burden among children under 5 years in Burkina Faso.  
392 *Malaria J.* 2022; 21: 143.
- 393 37. Fottsoh Fokam A, Rouamba T, Samadoulougou S, Ye Y, Kirakoya-Samadoulougou F. A Bayesian  
394 spatio-temporal framework to assess the effect of seasonal malaria chemoprevention on children under  
395 5 years in Cameroon from 2016 to 2021 using routine data. *Malaria J.* 2023; 22: 347.
- 396 38. Richardson S and Moukenet A and Diar MSI and de Cola MA and Rassi C and Counihan H and Roca-  
397 Feltrer A. Modeled Impact of Seasonal Malaria Chemoprevention on District-Level Suspected and  
398 Confirmed Malaria Cases in Chad Based on Routine Clinical Data (2013– 2018). *Am J Trop Med Hyg*  
399 2021; 105: 1712–1721.
- 400 39. Adjei MR, Kubio C, Buamah M, Sarfo A, Suuri T, Ibrahim S, Sadiq A, Abubakari II, Baafi JV.  
401 Effectiveness of seasonal malaria chemoprevention in reducing under-five malaria morbidity and  
402 mortality in the Savannah Region, Ghana. *Ghana Med J.* 2022; 56: 64–70.
- 403 40. Bisanzio D, Keita MS, Camara A, Guilavogui T, Diallo T, Barry H, Preston A, Bangoura L, Mbounga  
404 E, Florey LS, Taton JL, Fofana A, Reithinger R. Malaria trends in districts that were targeted and not-  
405 targeted for seasonal malaria chemoprevention in children under 5 years of age in Guinea, 2014–2021.  
406 *BMJ Global Health* 2024; 9: e013898.
- 407 41. Issiaka D, Barry A, Traore T, Diarra B, Cook D, Keita M, Sagara I, Duffy P, Fried M, Dicko A. Impact  
408 of seasonal malaria chemoprevention on hospital admissions and mortality in children under 5 years of  
409 age in Ouelessebougou, Mali. *Malaria J.* 2020; 19: 103.
- 410 42. ACCESS-SMC. Effectiveness of seasonal malaria chemoprevention at scale in west and central Africa:  
411 an observational study. *Lancet* 2020; 396: 1829–1840.
- 412 43. Gunasekera WMKTAW, Premaratne R, Fernando D, Munaz M, Piyasena MGY, Perera D,  
413 Wickremasinghe R, Ranaweera KDNP, Mendis K. A comparative analysis of the outcome of malaria  
414 case surveillance strategies in Sri Lanka in the prevention of re-establishment phase. *Malaria J* 2021;  
415 20: 80.
- 416 44. Mlacha YP, Wang D, Chaki PP, Gavana T, Zhou Z, Michael MG, Khatib R, Chila G, Msuya HM,  
417 Chaki E, Makungu C, Lin K, Tambo E, Rumisha SF, Mkude S, Mahende MK, Chacky F, Vounatsou P,  
418 Tanner M, Masanja H, Aregawi M, Hertzmark E, Xiao N, Abdulla S, Zhou XN. Effectiveness of the

- 419 innovative 1,7-malaria reactive community-based testing and response (1, 7-mRCTR) approach on  
420 malaria burden reduction in Southeastern Tanzania. *Malaria J* 2020; 19: 292.
- 421 45. Kitojo C, Chacky F, Kigadye ES, Mugasa JP, Lusasi A, Mohamed A, Walker P, Reaves EJ, Gutman  
422 JR, Ishengoma DS. Evaluation of a single screen and treat strategy to detect asymptomatic malaria  
423 among pregnant women from selected health facilities in Lindi region, Tanzania. *Malaria J* 2020; 19:  
424 438.
- 425 46. Bridges DJ, Miller JM, Chalwe V, Moonga H, Hamainza B, Steketee RW, Mambwe B, Mulube C, Wu  
426 L, Tetteh KKA, Drakeley C, Chishimba S, Mwenda M, Silumbe K, Larsen DA. Reactive focal drug  
427 administration associated with decreased malaria transmission in an elimination setting: Serological  
428 evidence from the cluster-randomized CoRE study. *PLoS GH* 2022; 2: e0001295.
- 429 47. Hilton ER, Gning-Cisse N, Assi A, Eyakou M, Koffi J, Gnakou B, Kouassi B, Flatley C, Chabi J,  
430 Gbalegba C, Alex Aimain S, Yah Kokrasset C, Antoine Tanoh M, N'Gotta S, Yao O, Egou Assi H,  
431 Konan P, Davis K, Constant E, Belemvire A, Yepassis-Zembrou P, Zinzindohoue P, Kouadio B,  
432 Burnett S. Reduction of malaria case incidence following the introduction of clothianidin-based indoor  
433 residual spraying in previously unsprayed districts: an observational analysis using health facility  
434 register data from Côte d'Ivoire, 2018–2022. *BMJ Global Health* 2024; 9: e013324.
- 435 48. Gogue C, Wagman J, Tynuv K, Saibu A, Yihdego Y, Malm K, Mohamed W, Akplu W, Tagoe T, Ofosu  
436 A, Williams I, Asiedu S, Richardson J, Fornadel C, Slutsker L, Robertson M. An observational analysis  
437 of the impact of indoor residual spraying in Northern, Upper East, and Upper West Regions of Ghana:  
438 2014 through 2017. *Malaria J* 2020; 19: 242.
- 439 49. Hilton ER, Rabeheroisa S, Ramandimbiarijaona H, Rajaratnam J, Belemvire A, Kapesa L, Zohdy S,  
440 Dentinger C, Gandaho T, Jacob D, Burnett S, Razafinjato C. Using routine health data to evaluate the  
441 impact of indoor residual spraying on malaria transmission in Madagascar. *BMJ Global Health* 2023; 8:  
442 e010818.
- 443 50. Wagman J, Gogue C, Tynuv K, Mihigo J, Bankineza E, Bah M, Diallo D, Saibu A, Richardson JH,  
444 Kone D, Fomba S, Bernson J, Steketee R, Slutsker L, Robertson M. An observational analysis of the  
445 impact of indoor residual spraying with non-pyrethroid insecticides on the incidence of malaria in  
446 Ségou Region, Mali: 2012–2015. *Malaria J* 2018; 17: 19.
- 447 51. Wagman J, Cissé I, Kone D, Fomba S, Eckert E, Mihigo J, Bankineza E, Bah M, Diallo D, Gogue C,  
448 Tynuv K, Saibu A, Richardson JH, Fornadel C, Slutsker L, Robertson M. Rapid reduction of malaria  
449 transmission following the introduction of indoor residual spraying in previously unsprayed districts: an  
450 observational analysis of Mopti Region, Mali, in 2017. *Malaria J* 2020; 17: 19.
- 451 52. Roh ME, Mpimbaza A, Oundo B, Irish A, Murphy M, Wu SL, White JS, Shiboski S, Glymour MM,  
452 Gosling R, Dorsey G, Sturrock H. Association between indoor residual spraying and pregnancy  
453 outcomes: a quasi-experimental study from Uganda. *Int J Epidemiol* 2022; 51: 1489–1501.
- 454 53. Namuganga JF, Epstein A, Nankabirwa JI, Mpimbaza A, Kiggundu M, Sserwanga A, Kapisi J,  
455 Arinaitwe E, Gonahasa S, Opigo J, Ebong C, Staedke SG, Shililu J, Okia M, Rutazaana D, Maiteki-  
456 Sebuguzi C, Belay K, Kanya MR, Dorsey G, Rodriguez-Barraquer I. The impact of stopping and  
457 starting indoor residual spraying on malaria burden in Uganda. *Nature Communications* 2021; 12: 2635.

- 458 54. Epstein A, Namuganga JF, Nabende I, Kanya EV, Kanya MR, Dorsey G, Sturrock H, Bhatt S,  
459 Rodriguez-Barraquer I, Greenhouse B. Mapping malaria incidence using routine health facility  
460 surveillance data in Uganda. *BMJ Global Health* 2022; 8: e011137.
- 461 55. Van Bortel W, Marien J, Jacobs BKM, Sinzinkayo D, Sinarinzi P, Lampaert E, D'hondt R, Mafuko JM,  
462 De Weggheleire A, Vogt F, Alexander N, Wint W, Maes P, Vanlerberghe V, Leclair C. Long-lasting  
463 insecticidal nets provide protection against malaria for only a single year in Burundi, an African  
464 highland setting with marked malaria seasonality. *BMJ Global Health* 2022; 7: e009674.
- 465 56. Kabeya TK, Kasongo JCM, Matumba NB, Tshibangu DI, Garcia-Morzon LA, Burgueno E. Impact of  
466 mass distribution of long-lasting insecticide nets on the incidence of malaria in Lomami, Democratic  
467 Republic of Congo: a study based on electronic health record data (2018 - 2019). *Panafrican Med J*  
468 2023; 45: 89.
- 469 57. Bisanzio D and Mutuku F and LaBeaud AD and Mungai PL and Muinde J and Busaidy H and Mukoko  
470 D and King CH and Kitron U. Use of prospective hospital surveillance data to define spatiotemporal  
471 heterogeneity of malaria risk in coastal Kenya. *Malaria J* 2015; 14: 482.
- 472 58. Kamau A and Nyaga V and Bauni E and Tsofa B and Noor AM and Bejon P and Scott JAG and  
473 Hammitt LL. Trends in bednet ownership and usage, and the effect of bednets on malaria  
474 hospitalization in the Kilifi Health and Demographic Surveillance System (KHDSS): 2008–2015. *BMC*  
475 *Infect Dis* 2017; 17: 720.
- 476 59. Kabera M, Mangala JN, Soebiyanto R, Mukarugwiro B, Munguti K, Mbituyumuremyi A, Lucchi NW,  
477 Hakizimana E. Impact of Pyrethroid Plus Piperonyl Butoxide Synergist-Treated Nets on Malaria  
478 Incidence 24 Months after a National Distribution Campaign in Rwanda. *Am J Trop Med Hyg* 2023;  
479 109: 1356–1362.
- 480 60. Kigozi SP, Kigozi RN, Epstein A, Mpimbaza A, Sserwanga A, Yeka A, Nankabirwa JI, Halliday K,  
481 Pullan RL, Rutazaana D, Sebuguzi CM, Opigo J, Kanya MR, Staedke SG, Dorsey G, Greenhouse B,  
482 Rodriguez-Barraquer I. Rapid shifts in the age-specific burden of malaria following successful control  
483 interventions in four regions of Uganda. *Malaria J* 2020; 19: 128.
- 484 61. Katureebe A, Zinszer K, Arinaitwe E, Rek J, Kakande E, Charland K, Kigozi R, Kilama M,  
485 Nankabirwa J, Yeka A, Mawejje H, Mpimbaza A, Katamba H, Donnelly MJ, Rosenthal PJ, Drakeley C,  
486 Lindsay SW, Staedke SG, Smith DL, Greenhouse B, Kanya MR, Dorsey G. Measures of Malaria  
487 Burden after Long-Lasting Insecticidal Net Distribution and Indoor Residual Spraying at Three Sites in  
488 Uganda: A Prospective Observational Study. *PLoS Medicine* 2016; 13: e1002167.
- 489 62. Mpimbaza A, Sserwanga A, Rutazaana D, Kapisi J, Walemwa R, Suiyanka L, Kyalo D, Kanya M,  
490 Opigo J, Snow RW (2020) Changing malaria fever test positivity among paediatric admissions to  
491 Tororo district hospital, Uganda 2012–2019. *Malaria J* 2020; 19: 416.
- 492 63. Lubinda J, Haque U, Bi Y, Shad MY, Keellings D, Hamainza B, Moore AJ. Climate change and the  
493 dynamics of age-related malaria incidence in Southern Africa. *Environ Res* 2021; 197: 111017.
- 494 64. Rouamba T, Samadoulougou S, Tinto H, Alegana VA, Kirakoya-Samadoulougou F. Bayesian  
495 Spatiotemporal Modeling of Routinely Collected Data to Assess the Effect of Health Programs in  
496 Malaria Incidence During Pregnancy in Burkina Faso. *Sci Rep.* 2020; 10: 2618.

- 497 65. Nigussie TZ, Zewotir T, Muluneh EK. Effects of climate variability and environmental factors on the  
498 spatiotemporal distribution of malaria incidence in the Amhara national regional state, Ethiopia. *Spat*  
499 *Spatiotemporal Epidemiol* 2022; 40: 100475.
- 500 66. Wagman J, Cisse I, Kone D, Fomba S, Eckert E, Mihigo J, Bankineza E, Bah M, Diallo D, Gogue C,  
501 Tynuv K, Saibu A, Richardson JH, Fornadel C, Slutsker L, Robertson M. Combining next-generation  
502 indoor residual spraying and drug-based malaria control strategies: observational evidence of a  
503 combined effect in Mali. *Malaria J* 2020; 19: 293.
- 504 67. Thomas R, Cirera L, Brew J, Saute F, Sicuri E. The short-term impact of a malaria elimination initiative  
505 in Southern Mozambique: Application of the synthetic control method to routine surveillance data.  
506 *Health Econ* 2021; 30: 2168–2184.
- 507 68. Rodriguez-Rodriguez D, Maraga S, Lorry L, Robinson LJ, Siba PM, Mueller I, Pulford J, Ross A,  
508 Hetzel MW. Repeated mosquito net distributions, improved treatment, and trends in malaria cases in  
509 sentinel health facilities in Papua New Guinea. *Malaria J* 2019; 18: 364.
- 510 69. Ashton RA, Bennett A, Al-Mafazy AW, Abass AK, Msellem MI, McElroy P, Kachur SP, Ali AS,  
511 Yukich J, Eisele TP, Bhattarai A. Use of Routine Health Information System Data to Evaluate Impact  
512 of Malaria Control Interventions in Zanzibar, Tanzania from 2000 to 2015. *eClinical Medicine* 2019;  
513 12: 11–19.
- 514 70. Ssempiira J, Kissa J, Nambuusi B, Kyoziira C, Rutazaana D, Mukooyo E, Opigo J, Makumbi F, Kasasa  
515 S, Vounatsou P. The effect of case management and vector-control interventions on space-time patterns  
516 of malaria incidence in Uganda. *Malaria J*. 2018; 17: 162.
- 517 71. Afrane YA, Zhou G, Githeko AK, Yan G. Utility of health facility-based malaria data for malaria  
518 surveillance. *PLoS One* 2013; 8: e54305.
- 519 72. Ashton RA, Bennett A, Yukich J, Bhattarai A, Keating J, Eisele TP. Methodological considerations for  
520 use of routine health information system data to evaluate malaria program impact in an era of declining  
521 malaria transmission. *Am J Trop Med Hyg* 2017; 97: 46–57.
- 522 73. Wagenaar BH, Sherr K, Fernandes Q, Wagenaar AC. Using routine health information systems for  
523 well-designed health evaluations in low- and middle-income countries. *Health Policy Plan* 2016;  
524 31:129–135.
- 525 74. WHO. Analysis and use of health facility data: guidance for malaria programme managers. Geneva:  
526 World Health Organization. 2018.
- 527 75. Hoxha K, Hung YW, Irwin BR, Grépin KA. Understanding the challenges associated with the use of  
528 data from routine health information systems in low- and middle-income countries: A systematic  
529 review. *Hlth Informat Management Journal* 2022; 51: 135–148.
- 530 76. Munn Z, Peters MDJ, Stern C, Tufanaru C, McArthur A, Aromataris E. Systematic review or scoping  
531 review? Guidance for authors when choosing between a systematic or scoping review approach. *BMC*  
532 *Med Res Methodol*. 2018; 18: 143.
- 533 77. Ssempiira J, Kissa J, Nambuusi B, Mukooyo E, Opigo J, Makumbi F, Kasasa S, Vounatsou P.  
534 Interactions between climatic changes and intervention effects on malaria spatio-temporal dynamics in  
535 Uganda. *Parasite Epidemiol Control*. 2018; 3: e00070.



- 536 78. Lubinda J, Haque U, Bi Y, Shad MY, Keellings D, Hamainza B, Moore AJ. Climate change and the  
537 dynamics of age-related malaria incidence in Southern Africa. *Environ Res.* 2021; 197: 111017.
- 538 79. Nyawanda BO, Beloconi A, Khagayi S, Bigogo G, Obor D, Otieno NA, Lange S, Franke J, Sauerborn  
539 R, Utzinger J, Kariuki S, Munga S, Vounatsou P. The relative effect of climate variability on malaria  
540 incidence after scale-up of interventions in western Kenya: A time-series analysis of monthly incidence  
541 data from 2008 to 2019. *Parasite Epidemiol Control.* 2023; 21: e00297.
- 542 80. DePina A, Barros H, Tiffany A, Stresman G. Sustaining surveillance as an intervention during the  
543 COVID-19 pandemic in Cabo Verde and implications for malaria elimination. *Front Immunol.* 2022;  
544 13: 956864.
- 545 81. Sampa M, Fisa R, Mukuma C, Mwanza M, Hamainza B, Musonda P. The effect of COVID-19 on  
546 malaria cases in Zambia: a mixed effect multilevel analysis. *Malar J.* 2024; 23: 85.
- 547 82. Heuschen AK, Abdul-Mumin A, Adokiya M, Lu G, Jahn A, Razum O, Winkler V, Müller O. Impact of  
548 the COVID-19 pandemic on malaria cases in health facilities in northern Ghana: a retrospective  
549 analysis of routine surveillance data. *Malar J.* 2022; 21: 149.
- 550 83. Rowe AK, Kachur SP, Yoon SS, Lych M, Slutsker L, Steketee RW. Caution is required when using  
551 health facility-based data to evaluate the health impact of malaria control efforts in Africa. *Malar J*  
552 2009; 8: 1–3.

553 **Tables and Figures**

554

555 **Figure 1. PRISMA Flowchart of Records (Studies) included in Scoping Review**

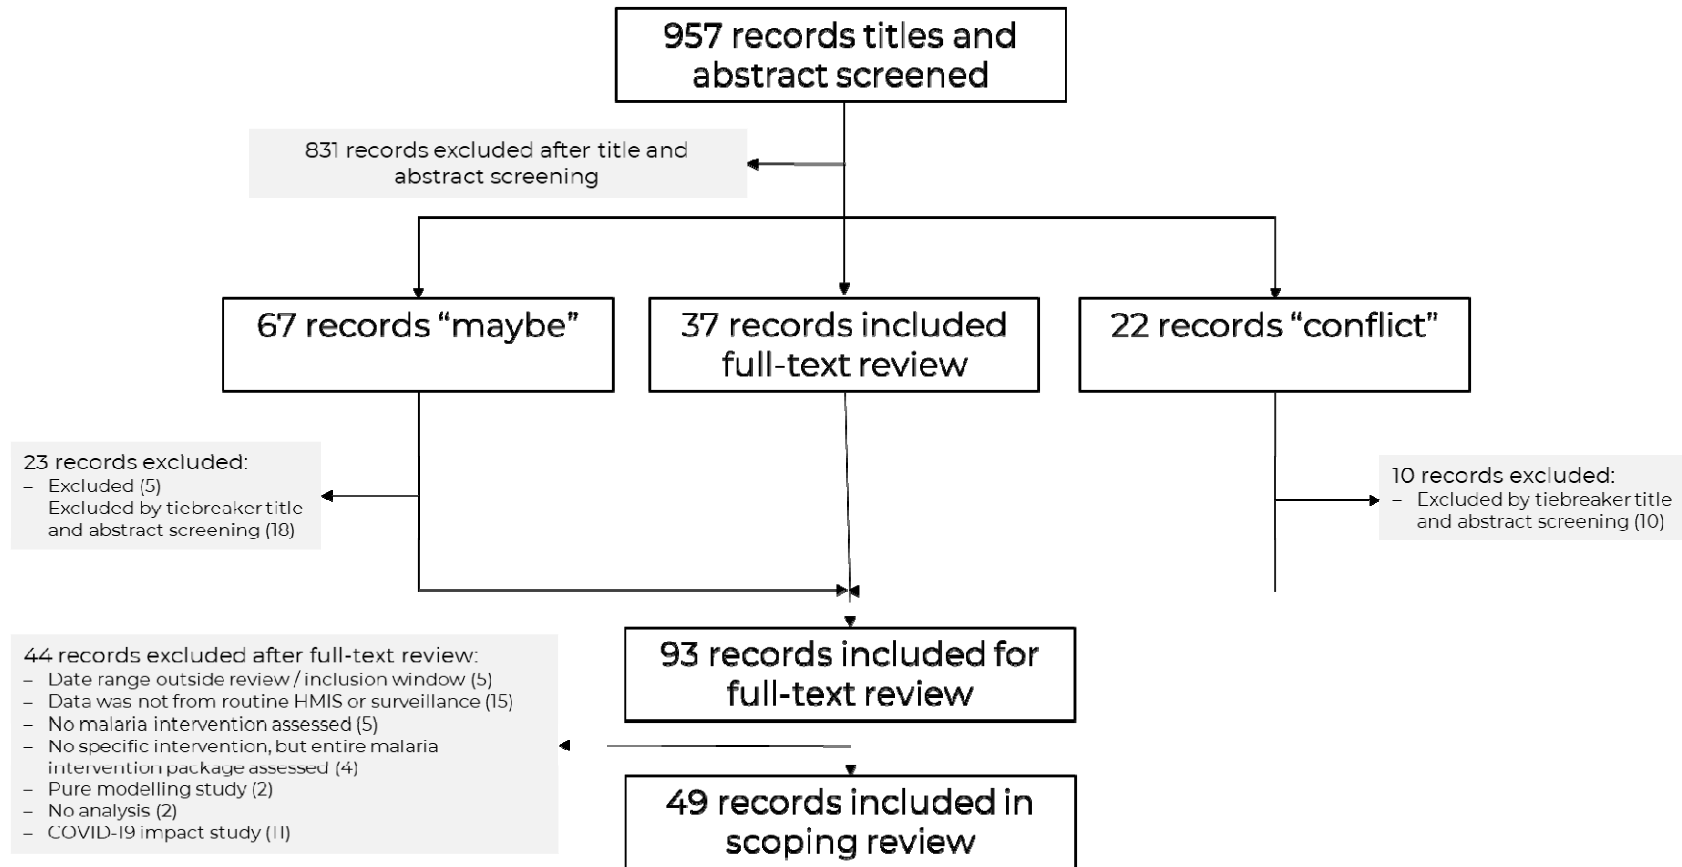

556

557 Table 1. Characteristics of 49 records included in scoping review.

| Geography                        | Study Period | Specific Intervention Assessed                                         | Approach to Measuring Effectiveness / Impact                           | Health Information System Data Platform used for Analyses | Indicators / Variables included in Analyses                                                                                                                    | Target Population                                       | Key Findings                                                                                                                                                                                                                                                                                                                                                                                                                                                                                                                                                                                                                                                                                                                                                                                           | Ref. |
|----------------------------------|--------------|------------------------------------------------------------------------|------------------------------------------------------------------------|-----------------------------------------------------------|----------------------------------------------------------------------------------------------------------------------------------------------------------------|---------------------------------------------------------|--------------------------------------------------------------------------------------------------------------------------------------------------------------------------------------------------------------------------------------------------------------------------------------------------------------------------------------------------------------------------------------------------------------------------------------------------------------------------------------------------------------------------------------------------------------------------------------------------------------------------------------------------------------------------------------------------------------------------------------------------------------------------------------------------------|------|
| <b>Diagnosis &amp; Treatment</b> |              |                                                                        |                                                                        |                                                           |                                                                                                                                                                |                                                         |                                                                                                                                                                                                                                                                                                                                                                                                                                                                                                                                                                                                                                                                                                                                                                                                        |      |
| Brazil                           | 2021–2022    | Updated treatment algorithm for <i>P. vivax</i> radical cure           | Multivariate analysis                                                  | rHMIS (routine facility patient records / registers)      | ¶ # malaria recurrences at 60, 90 and 180 days                                                                                                                 | Entire population, as well as population >16 yrs of age | In all treated patients of any age and any glucose-6-phosphate dehydrogenase (G6PD) status, recurrence-free effectiveness at day 180 was 75.8% with tafenoquine, 73.4% with 7-day primaquine, and 82.1% with weekly primaquine. In patients aged at least 16 years who were G6PD normal, recurrence-free effectiveness until day 90 was 88.6% with tafenoquine and 83.5% with 7-day primaquine. Over 180 days, median time to recurrence in patients aged at least 16 years who were G6PD normal was 92 days with tafenoquine and 68 days with 7-day primaquine. Single-dose tafenoquine was more effective at preventing <i>P. vivax</i> recurrence in patients aged at least 16 years who were G6PD normal compared with 7-day primaquine at day 90, while overall efficacy at 180 days was similar. | 22   |
| India                            | 2009–2017    | Early diagnosis and treatment                                          | Difference-in difference analysis and interrupted time series analysis | rHMIS (DHIS2)                                             | ¶ Monthly blood examination rate (MBER) ¶ Monthly parasite index (MPI)                                                                                         | Entire population                                       | During program (intervention) implementation, adjusting for control areas, analysis indicated a 25% increase in MBER and a 96% increase in MPI, followed by a 47% decline in MPI post-program, though MBER was maintained.                                                                                                                                                                                                                                                                                                                                                                                                                                                                                                                                                                             | 23   |
| India                            | 2011–2015    | Universal access to early diagnosis and treatment                      | Difference-in difference analysis                                      | rHMIS (DHIS2)                                             | ¶ Annual blood examination rate (ABER) ¶ Annual parasite index (MPI)                                                                                           | Entire population                                       | Control-adjusted post-pre changes in API showed that 5.5 more cases were diagnosed, and 3.6 more cases were tested per facility in the intervention versus control areas. Larger differences in post-pre changes in API between intervention and control facilities were registered in the higher transmission-risk areas.                                                                                                                                                                                                                                                                                                                                                                                                                                                                             | 24   |
| Myanmar                          | 2015         | Access to and quality of malaria treatment (comparison between village | Descriptive and inferential analysis                                   | rHMIS                                                     | ¶ # suspected clinical malaria cases, incl. test result, species type, severity of malaria, treatment initiation status, time of initiation of treatment (≤ 24 | Entire population                                       | Of 978,735 undifferentiated fever patients screened, 11.0% of patients were found malaria positive; the malaria positivity in VHV and BHS group were 11.1% and 10.9% respectively. Access to malaria care: higher proportion of children aged                                                                                                                                                                                                                                                                                                                                                                                                                                                                                                                                                          | 25   |

|         |           |                                                       |                                                   |       |                                                                                                                                    |                   |                                                                                                                                                                                                                                                                                                                                                                                                                                                                                                                                                                                                                                                                                                                                     |    |
|---------|-----------|-------------------------------------------------------|---------------------------------------------------|-------|------------------------------------------------------------------------------------------------------------------------------------|-------------------|-------------------------------------------------------------------------------------------------------------------------------------------------------------------------------------------------------------------------------------------------------------------------------------------------------------------------------------------------------------------------------------------------------------------------------------------------------------------------------------------------------------------------------------------------------------------------------------------------------------------------------------------------------------------------------------------------------------------------------------|----|
|         |           | health volunteers [VHV] and basic health staff [BHS]) |                                                   |       | or > 24 hrs of fever) and the regimen of treatment provided                                                                        |                   | 5–14 years (21.8% vs 17.3%) and females (43.7% vs 41.8%) with fever were screened for malaria by VHV compared to BHS. However, the same for children aged <5 years was 2.2% lower in VHV group compared to BHS. For quality of malaria care, after adjustment for potential confounders, patients with malaria provided care by VHV had 1.02 times higher chance of receiving treatment compared to BHS; VHV were more accessible to children and women than BHS in providing malaria screening services.                                                                                                                                                                                                                           |    |
| Myanmar | 2011–2016 | Diagnosis and treatment following deployment of CHWs  | Negative binomial mixed effects regression models | rHMIS | ↑# RDT confirmed cases ↓ MBER and ABER ↓ prevalence and incidence of confirmed malaria cases                                       | Entire population | Communities with CHWs providing malaria diagnosis and treatment experienced declines in <i>P. falciparum</i> and <i>P. vivax</i> malaria incidence of 70% and 64%, respectively. RDT positivity rates declined similarly, with declines of 70% for <i>P. falciparum</i> and 65% for <i>P. vivax</i> with each year of CHW operation. In four cohorts studied, adding a BHC package was associated with an immediate and sustained increase in blood examination rates (step-change rate ratios 2.3, 5.4, 1.7, and 1.1). CHWs have overseen dramatic declines in <i>P. falciparum</i> and <i>P. vivax</i> malaria in rural Myanmar. Expanding their remit to general health care has sustained community uptake of malaria services. | 26 |
| Myanmar | 2011–2018 | Diagnosis and treatment following deployment of CHWs  | Negative binomial mixed effects regression models | rHMIS | ↑# RDT confirmed cases ↓ MBER and ABER ↓ prevalence and incidence of confirmed malaria cases                                       | Entire population | Incidence of <i>P. falciparum</i> malaria (including mixed infections) and <i>P. vivax</i> declined by 70% and 56%, respectively, for each year of CHW operation. Malaria RDT positivity rates for <i>P. falciparum</i> and <i>P. vivax</i> declined by 69% and 53%, respectively. Introduction of CHWs providing community-based malaria diagnosis and treatment and basic health care services in remote communities in Mon state was associated with a substantial reduction in malaria.                                                                                                                                                                                                                                         | 27 |
| Panama  | 2014–2018 | Diagnosis and treatment following deployment of CHWs  | Incidence rate ratios                             | rHMIS | ↑TPR ↓ ABER ↓ Incidence of uncomplicated malaria ↓ Time between symptom onset and diagnosis ↓ Time between diagnosis and treatment |                   | During pilot, CHWs detected 61% of all reported cases from the region. Test positivity in the population tested by CHWs was higher (22%) than in those tested through active surveillance, both before (3.8%) and during the pilot (2.9%). From the pre-pilot to the pilot period, ABER decreased (9.8 per 100 vs. 8.0 per 100), test positivity increased (4.2% to 8.5%) and reported incidence                                                                                                                                                                                                                                                                                                                                    | 28 |

|        |             |                                       |                                                                                                                                                                                         |                                                     |                                                                                                                                                                                                                                                                                                                                   |                   |                                                                                                                                                                                                                                                                                                                                                                                                                                                                                                                                                         |    |
|--------|-------------|---------------------------------------|-----------------------------------------------------------------------------------------------------------------------------------------------------------------------------------------|-----------------------------------------------------|-----------------------------------------------------------------------------------------------------------------------------------------------------------------------------------------------------------------------------------------------------------------------------------------------------------------------------------|-------------------|---------------------------------------------------------------------------------------------------------------------------------------------------------------------------------------------------------------------------------------------------------------------------------------------------------------------------------------------------------------------------------------------------------------------------------------------------------------------------------------------------------------------------------------------------------|----|
|        |             |                                       |                                                                                                                                                                                         |                                                     |                                                                                                                                                                                                                                                                                                                                   |                   | increased (4.1 cases per 1000 to 6.9 cases per 1000). The percent of cases tested on the day of symptom onset increased from 8 to 27% and those treated on the day of their test increased from 26 to 84%. CHW network allowed for replacement of routine active surveillance with strong passive case detection leading to more targeted and timely testing and treatment.                                                                                                                                                                             |    |
| Rwanda | 2015 – 2016 | Home-based case management            | Interrupted time series analysis                                                                                                                                                        | rHMIS (Système Informatique de Santé Communautaire) | Monthly incidence of uncomplicated malaria cases at health centers<br>Monthly incidence of severe malaria at hospitals                                                                                                                                                                                                            | PO5               | PO5 readily accessed malaria diagnosis and treatment services from CHWs. Uncomplicated and severe malaria increased in postintervention period for both intervention and control districts.                                                                                                                                                                                                                                                                                                                                                             | 29 |
| Uganda | 2010–2014   | Introduction of RDTs                  | Interrupted time series analysis                                                                                                                                                        | rHMIS                                               | # diagnostic tests per month                                                                                                                                                                                                                                                                                                      | Entire population | Proportion of patients with parasite-based diagnoses more than tripled to 34% after the introduction of RDTs; RDTs largely replaced microscopy as the diagnostic method of choice. Compared to patients admitted during the pre-RDT period, patients admitted to the health centre with malaria in the post-RDT period had significantly reduced odds of being referred to another health centre, receiving antibiotics, and a significantly shorter mean length of stay.                                                                               | 30 |
| Zambia | 2015–2020   | Scale-up of community case management | Negative binomial generalized linear mixed-effect models                                                                                                                                | rHMIS (DHIS2)                                       | CU5 inpatient admissions with confirmed severe malaria<br>all-ages inpatient admissions with confirmed severe malaria<br>CU5 deaths among inpatient admissions with confirmed malaria<br>all-ages deaths among inpatient admissions with confirmed malaria.                                                                       | CU5 and all ages  | After accounting for covariates, an increase of one malaria service point per 1,000 was associated with a 19% reduction in severe malaria admissions among CU5 and 23% reduction in malaria deaths among CU5                                                                                                                                                                                                                                                                                                                                            | 31 |
| Zambia | 2017–2018   | Introduction of rectal artesunate     | Surveys carried out near the beginning and end of the intervention period; health facilities, which contributed data on malaria to the Zambian HMIS; and a community monitoring system. | rHMIS (DHIS2)                                       | % CU5 with suspected severe malaria who received pre-referral rectal artesunate in the community<br>% CU5 with suspected severe malaria who received pre-referral artesunate and who were then referred to a health facility<br>% CU5 who also received a detailed counter-referral form<br>case fatality rate of CU5 with severe | CU5               | At baseline, CHWs reported identifying an average of 0.4 cases per month of uncomplicated or severe malaria among CU5 in preceding 12 months; at endline, the average was 3.5 cases per month. The year before the start of the Intervention, 18 deaths resulted from 224 cases of confirmed severe malaria among CU5 who presented at the 8 intervention health facilities (i.e., case fatality rate of 8% (18/224)). Post-intervention, 619 confirmed cases of severe malaria in CU5 were recorded at intervention health facilities and three deaths | 32 |

|                                |                                 |                                   |                                              |                                                                   | malaria who were referred                                                                                                                                          |                                      | occurred (i.e., case fatality rate was 0.5% (3/619)).                                                                                                                                                                                                                                                                                                                                                                                                                                                                                    |    |
|--------------------------------|---------------------------------|-----------------------------------|----------------------------------------------|-------------------------------------------------------------------|--------------------------------------------------------------------------------------------------------------------------------------------------------------------|--------------------------------------|------------------------------------------------------------------------------------------------------------------------------------------------------------------------------------------------------------------------------------------------------------------------------------------------------------------------------------------------------------------------------------------------------------------------------------------------------------------------------------------------------------------------------------------|----|
| <b>Preventive chemotherapy</b> |                                 |                                   |                                              |                                                                   |                                                                                                                                                                    |                                      |                                                                                                                                                                                                                                                                                                                                                                                                                                                                                                                                          |    |
| Uganda                         | 2014–2015                       | IPTc                              | Incidence rate ratio (IRR)                   | rHMIS, complemented by community and household prevalence surveys | 1 Routinely collected case-related health facility numbers of uncomplicated malaria 1 Malaria prevalence by microscopy and PCR 1 Parasite density 1 Adverse events | Children 6 months to 15 years of age | Compared to same period during previous year, incidence of malaria in target populations was reduced (IRR 0.73 among CU5; IRR 0.70 among children aged 5–14 years). Among those not targeted for intervention, incidence between the 2 years increased (IRR 1.49). Cross-sectional surveys showed a prevalence of parasitaemia (microscopy or PCR) of 12.9–16.4% (95% CI 12.6–19.3) during the intervention, with the highest prevalence among children aged 5–14 years, but with a large increase 8 weeks after the final distribution. | 33 |
| Kenya                          | 2015–2021                       | IPTp                              | Multivariate logistic regression model       | rHMIS (facility patient records / registries)                     | 1 # newborns with low birth weight (LBW) 1 # stillbirths                                                                                                           | Pregnant women                       | Compared with no dose, IPTp3+ was associated with 27% reduction in the risk of LBW. A dose-response association was observed with increasing doses of SP from the second trimester linked to increasing protection against LBW deliveries. IPTp3+ were also associated with a 21% reduction in stillbirths.                                                                                                                                                                                                                              | 34 |
| Mozambique                     | 2010–2014                       | MDA (on top of Dx/Rx, IPTp, ITNs) | Synthetic control method (SCM)               | rHMIS (IDSR)                                                      | 1 Weekly # uncomplicated confirmed malaria cases 1 weekly malaria incidence rate (cases per 1000 population at risk)                                               | CU5 and PO5                          | Between August 2015 and April 2017, a total of 13,322 (78%) cases of malaria were averted relative to the synthetic control. During the peak malaria seasons, the integrated intervention package resulted in an 87% reduction in Year 1, and 79% reduction in Year 2.                                                                                                                                                                                                                                                                   | 35 |
| Zambia                         | 2015–2016                       | MDA                               | Interrupted time series analysis             | rHMIS (DHIS2)                                                     | 1 Monthly confirmed malaria case incidence                                                                                                                         | Entire population                    | MDA health facility catchment areas (HFCAs) saw a 46% greater decrease in incidence at the time of intervention than comparison areas (IRR = 0.536); however, incidence increased toward the end of the season. No HFCAs saw a transmission interruption. Programmatic MDA, implemented during 1 year with imperfect coverage in low transmission areas with suboptimal vector control coverage, significantly reduced incidence; however, elimination will require additional tools.                                                    | 36 |
| Burkina Faso                   | 2013–2016                       | SMC                               | Negative binomial regression model           | rHMIS (DHIS2)                                                     | 1 # confirmed uncomplicated malaria cases 1 # confirmed severe malaria cases                                                                                       | CU5                                  | Two SMC rounds were associated with a reduction of uncomplicated malaria (IRR: 69%) and severe malaria (IRR = 73%) incidence among CU5.                                                                                                                                                                                                                                                                                                                                                                                                  | 37 |
| Cameroon                       | 2011–2021 (baseline / control); | SMC                               | Interrupted time series analysis in Bayesian | rHMIS (DHIS2)                                                     | 1 # confirmed uncomplicated malaria cases 1 # confirmed severe malaria cases                                                                                       | CU5                                  | SMC rounds were associated with a 10-15% reduction of uncomplicated malaria incidence and a 0-51% reduction of severe malaria incidence                                                                                                                                                                                                                                                                                                                                                                                                  | 38 |

|                                                                                  |                 |     |                                                                                 |                                                                                                                               |                                                                                                                        |                           |                                                                                                                                                                                                                                                                                                                                                                                                                                            |    |
|----------------------------------------------------------------------------------|-----------------|-----|---------------------------------------------------------------------------------|-------------------------------------------------------------------------------------------------------------------------------|------------------------------------------------------------------------------------------------------------------------|---------------------------|--------------------------------------------------------------------------------------------------------------------------------------------------------------------------------------------------------------------------------------------------------------------------------------------------------------------------------------------------------------------------------------------------------------------------------------------|----|
|                                                                                  | 2016–2021 (SMC) |     | framework                                                                       |                                                                                                                               |                                                                                                                        |                           | among CU5. While there was an effect for all 5 study years on uncomplicated malaria, there was no effect on severe malaria for 2020 and 2021.                                                                                                                                                                                                                                                                                              |    |
| Chad                                                                             | 2013–2018       | SMC | Generalized additive models were fitted with separate cyclic cubic spline terms | rHMIS (DHIS2)                                                                                                                 | ‡# suspected outpatient cases ‡# confirmed outpatient cases                                                            | CU5                       | Compared to no-intervention areas, SMC was associated with lower monthly counts of both suspected (IRR: 0.82) and confirmed malaria cases (IRR: 0.81), representing around 20% reduction in malaria incidence. Sensitivity analyses showed effect sizes of up to 28% after modifying model assumptions.                                                                                                                                    | 39 |
| Ghana                                                                            | 2018–2019       | SMC | Incidence rate ratios                                                           | rHMIS (DHIS2)                                                                                                                 | ‡# uncomplicated malaria cases ‡# severe malaria ‡# deaths                                                             | CU5                       | There was 17% and 67% reduction in malaria-related morbidity and mortality, respectively, in the SMC implementation year compared with the non-SMC baseline. This translated into nearly 9,300 episodes of all forms of malaria and nine malaria-attributable deaths averted by the intervention.                                                                                                                                          | 40 |
| Guinea                                                                           | 2014–2021       | SMC | Compound annual growth rate (CAGR)                                              | rHMIS (DHIS2)                                                                                                                 | ‡# clinical cases ‡Test positivity rate ‡Incidence uncomplicated confirmed malaria ‡Incidence severe confirmed malaria | CU5 and entire population | For CU5 and all age groups, CAGR of TPR, uncomplicated malaria incidence, severe malaria incidence and deaths was statistically lower in SMC compared with non-SMC districts. Even in an operational programming context, adding SMC to the malaria intervention package yields a positive epidemiological impact and results in a greater reduction in TPR, as well as the incidence of uncomplicated and severe malaria in CU5.          | 41 |
| Mali                                                                             | 2015–2017       | SMC | Negative binomial regression model                                              | rHMIS (facility patients records / registries)                                                                                | ‡# hospitalizations ‡# deaths                                                                                          | CU5                       | Incidence rate of all cause hospital admissions was 19.60 per 1000 person-years in the intervention group compared to 33.45 per 1000 person-years in the control group, giving an IRR adjusted for age and gender of 0.61. All-cause mortality rate per 1000 person-years was 8.29 in control areas compared to 3.63 in intervention areas; age and gender adjusted mortality rate ratio = 0.44.                                           | 42 |
| Multi-country (Burkina Faso, Chad, The Gambia, Guinea, Mali, Niger, and Nigeria) | 2015–2016       | SMC | Country-level case-control studies                                              | rHMIS (DHIS2 in Burkina Faso and The Gambia; facility patient records / registries in Chad, Guinea, Mali, Niger, and Nigeria) | ‡Incidence confirmed outpatient cases ‡Incidence hospital admissions ‡Incidence malaria-related deaths                 | CU5                       | SMC was associated with a protective effectiveness of 88.2% over 28 days in case-control studies. In Burkina Faso and The Gambia, SMC was associated with 42.4% and 56.6% reductions in the number of malaria deaths, respectively. Over 2015–16, the estimated reduction in confirmed malaria cases at outpatient clinics during the high transmission period in the seven countries ranged from 25.5% in Nigeria to 55.2% in The Gambia. | 43 |



| <b>Surveillance</b>   |           |                                                                                                                 |                                                                                                                  |                                                                                  |                                                                                                                                                             |                   |                                                                                                                                                                                                                                                                                                                                                                                                                                                                                                           |    |
|-----------------------|-----------|-----------------------------------------------------------------------------------------------------------------|------------------------------------------------------------------------------------------------------------------|----------------------------------------------------------------------------------|-------------------------------------------------------------------------------------------------------------------------------------------------------------|-------------------|-----------------------------------------------------------------------------------------------------------------------------------------------------------------------------------------------------------------------------------------------------------------------------------------------------------------------------------------------------------------------------------------------------------------------------------------------------------------------------------------------------------|----|
| Sri Lanka             | 2017–2019 | Surveillance. Passive Case Detection (PCD) vs Reactive Case Detection (RACD) vs Proactive Case Detection (PACD) | Descriptive                                                                                                      | rHMIS                                                                            | ‡# blood smears examined microscopically ‡ Yield = # cases detected by method / # slides examined by method x 100,000                                       | Entire population | In study period, total of 158 malaria cases were reported, with between 666,325 and 725,149 blood smears examined annually. PCD detected 95.6%, with a yield of 16.1 cases per 100,000 blood smears examined. RACD and PACD produced a yield of 11.2 and 0.3, respectively. Despite over half of the blood smears examined being obtained by screening spatial cohorts within RACD and PACD, the yield of both was zero over all three years.                                                             | 44 |
| Tanzania (mainland)   | 2015–2018 | Surveillance. 1, 7 malaria reactive community-based testing and response                                        | Logistic regression models                                                                                       | rHMIS (facility patient records / registries), complemented by household surveys | ‡Malaria prevalence by RDTs ‡ Incidence of confirmed malaria case incidence                                                                                 | Entire population | Overall, 85 rounds of 1,7-mRCTR conducted in intervention wards significantly reduced the odds of malaria infection by 66% beyond the effect of the standard programming. In villages conducting 1,7-mRCTR, the short-term case ratio decreased by over 15.7% compared to baseline.                                                                                                                                                                                                                       | 45 |
| Tanzania (mainland)   | 2017–2018 | Surveillance. Single screening and treatment (SST) for pregnant women their first antenatal care (ANC) visit    | Logistic regression models                                                                                       | rHMIS (facility patient records / registries)                                    | ‡# asymptomatic infections among pregnant women detected by SST, who would have been missed in the absence of the policy                                    | Pregnant women    | Over study period, 1,845 women attended their first ANC visits; overall 15.0% of the women had positive RDTs. For every 100 pregnant women in the moderate/high and low transmission areas, SST identified 60 and 26 pregnant women, respectively, with asymptomatic infections that would have otherwise been missed.                                                                                                                                                                                    | 46 |
| Zambia                | 2016–2018 | Surveillance. Presumptive treatment during reactive case detection (rFDA)                                       | Generalized linear model with the HFCAs as a random intercept and a negative binomial link due to overdispersion | rHMIS, complemented by endline cross-sectional survey                            | ‡Suspected malaria case incidence ‡ Confirmed malaria case incidence ‡Serology and PCR-based malaria prevalence (endline cross-sectional population survey) | Entire population | No significant difference was identified from routine incidence and endline PCR prevalence data to determine intervention effectiveness. Comparing long-term serological markers, a 19% reduction in seropositivity for the rFDA intervention using a difference in differences approach incorporating serological positivity and age. Serological analyses provide compelling evidence that rFDA both has an impact on malaria transmission and is an appropriate end-game malaria elimination strategy. | 47 |
| <b>Vector Control</b> |           |                                                                                                                 |                                                                                                                  |                                                                                  |                                                                                                                                                             |                   |                                                                                                                                                                                                                                                                                                                                                                                                                                                                                                           |    |
| Côte d'Ivoire         | 2020–2021 | IRS                                                                                                             | Interrupted time series                                                                                          | rHMIS (DHIS2)                                                                    | ‡# monthly RDT/microscopy-confirmed uncomplicated malaria cases                                                                                             | Entire population | An estimated 10,988 malaria cases were averted in IRS districts the year following the 2020 IRS campaign, representing a 15.9% reduction compared with if IRS had not been deployed. Case incidence in IRS districts dropped by 27.7% (IRR 0.723) the month after the campaign. In the 8 months after the 2021 campaign, 14,170                                                                                                                                                                           | 48 |

|            |           |     |                                                        |               |                                                                                    |                   |                                                                                                                                                                                                                                                                                                                                                                                                                                                                                                                                                                                          |    |
|------------|-----------|-----|--------------------------------------------------------|---------------|------------------------------------------------------------------------------------|-------------------|------------------------------------------------------------------------------------------------------------------------------------------------------------------------------------------------------------------------------------------------------------------------------------------------------------------------------------------------------------------------------------------------------------------------------------------------------------------------------------------------------------------------------------------------------------------------------------------|----|
|            |           |     |                                                        |               |                                                                                    |                   | estimated cases were averted, a 24.7% reduction, and incidence in IRS districts dropped by 37.9% (IRR 0.621), immediately after IRS. Case incidence in control districts did not change following IRS either year and the difference in incidence level change between IRS and control districts was significant both years.                                                                                                                                                                                                                                                             |    |
| Ghana      | 2014–2017 | IRS | Descriptive                                            | rHMIS (DHIS2) | Monthly incidence of RDT-confirmed malaria cases reported per 10,000 person-months | Entire population | District-level analysis from Northern Region showed 39%, 26%, and 58% fewer confirmed malaria cases reported in IRS districts relative to non-IRS comparator districts for 2015, 2016, and 2017, respectively, translating into approximately 257,000 fewer cases than expected over three years. In Upper East Region, the effect on reported malaria cases of withdrawing IRS from the region was striking; after spray operations were suspended in 2015, incidence increased an average of 485% per district compared to 2014.                                                       | 49 |
| Madagascar | 2016–2021 | IRS | Multilevel negative-binomial generalized linear models | rHMIS         | # monthly RDT-confirmed uncomplicated malaria cases                                | Entire population | IRS reduced case incidence by an estimated 30.3% from 165.8 cases per 1,000 population under a counterfactual no IRS scenario to 114.3 over 12 months post-IRS campaign in nine districts. A third year of IRS reduced malaria cases 30.9% more than a first year (IRR=0.578) and 26.7% more than a second year (IRR=0.733). Coverage of 86%–90% was associated with a 19.7% reduction in incidence (IRR=0.803) compared with coverage ≤85%.                                                                                                                                             | 50 |
| Mali       | 2012–2016 | IRS | Interrupted time series analysis                       | rHMIS (DHIS2) | # RDT-confirmed uncomplicated malaria cases                                        | Entire population | During 2012–2014, rapid reductions in malaria incidence were observed 6 months post-IRS campaign, though most of the reduction in cases (70% of the total) was concentrated in the first 2 months after each campaign was completed. Compared to non-IRS districts, in which normal seasonal patterns of malaria incidence were observed, an estimated 286,745 total fewer cases of all-age malaria were observed in IRS districts. Suspension of IRS in Bla District after the 2014 campaign resulted in a 70% increase in under-5-years-old malaria incidence rates from 2014 to 2015. | 51 |
| Mali       | 2016–2018 | IRS | Interrupted time                                       | rHMIS (DHIS2) | # confirmed uncomplicated                                                          | Entire population | Compared to areas with no IRS, cumulative case                                                                                                                                                                                                                                                                                                                                                                                                                                                                                                                                           | 52 |

|         |           |      |                                                                                              |                                               |                                                                                |                   |                                                                                                                                                                                                                                                                                                                                                                                                                                                                                                                                                                                                                                        |    |
|---------|-----------|------|----------------------------------------------------------------------------------------------|-----------------------------------------------|--------------------------------------------------------------------------------|-------------------|----------------------------------------------------------------------------------------------------------------------------------------------------------------------------------------------------------------------------------------------------------------------------------------------------------------------------------------------------------------------------------------------------------------------------------------------------------------------------------------------------------------------------------------------------------------------------------------------------------------------------------------|----|
|         |           |      | series analysis                                                                              |                                               | malaria cases, case incidence rates in health facility catchment areas (HFCAs) |                   | incidence rates in IRS areas were reduced 16% in Ségou Region during the 6 months following the 2016 campaign and 31% in Mopti Region during the 6 months following the 2017 campaign—averting an estimated 22,000 cases. Across HFCAs where there was no IRS in either year, peak malaria case incidence rates fell by an average of 22% from 2016 to 2017. At HFCAs in Mopti where IRS was introduced in 2017, peak incidence fell by an average of 42% between these years. In Ségou Region, the opposite effect was observed, with peak incidence increasing by an average 106% in those HFCAs where IRS was withdrawn after 2016. |    |
| Uganda  | 2013–2017 | IRS  | Difference-in-difference analysis                                                            | rHMIS (facility patient records / registries) | # newborns with low birth weight (LBW), # stillbirths                          | Pregnant women    | Matrix completion method (MCM) estimates indicated that the campaign was associated with a 33% reduction in LBW incidence (IRR = 0.67). Difference in difference estimates were similar to MC-NNM (IRR = 0.69). IRS was not associated with substantial reductions in stillbirth incidence (MCM IRR = 0.94). HIV status modified the effects of IRS effect on LBW, whereby HIV-negative women appeared to benefit from IRS, but not HIV-positive women (IRR = 1.12).                                                                                                                                                                   | 53 |
| Uganda  | 2013–2020 | IRS  | Mixed effects negative binomial regression models with random intercepts for health facility | rHMIS (14 sentinel facilities)                | Monthly count of laboratory-confirmed uncomplicated malaria cases              | Entire population | Stopping IRS was associated with a 5-fold increase in malaria incidence within 10 months, but reinstating IRS was associated with an over 5-fold decrease within 8 months. In areas where IRS was initiated and sustained, malaria incidence dropped by 85% after year 4.                                                                                                                                                                                                                                                                                                                                                              | 54 |
| Uganda  | 2019–2020 | IRS  | Spatio-temporal models                                                                       | rHMIS (74 sentinel facilities)                | Monthly count of laboratory-confirmed uncomplicated malaria cases              | Entire population | Model predicted 1,062,216 cases in IRS scenario and 7,235,816 cases in the modelled non-IRS scenario, suggesting ca. 6.2 million cases were averted across 24-month period of IRS implementation. The difference between the estimated counterfactual incidence and estimated incidence under IRS was greater in districts in the north, where incidence was higher.                                                                                                                                                                                                                                                                   | 55 |
| Burundi | 2011–2019 | ITNs | Generalized additive models                                                                  | rHMIS (DHIS2)                                 | Malaria incidence (# uncomplicated malaria cases)                              | Entire population | A fast and steep decline of malaria incidence was noted during the first year after mass LLIN distribution. In years 2 and 3 after distribution, malaria cases started to rise again to levels higher than before the control intervention.                                                                                                                                                                                                                                                                                                                                                                                            | 56 |

|        |                            |                                            |                                                  |                                                |                                                                                                                |                                        |                                                                                                                                                                                                                                                                                                                                                                                                                                                                                                                                                                                                                     |    |
|--------|----------------------------|--------------------------------------------|--------------------------------------------------|------------------------------------------------|----------------------------------------------------------------------------------------------------------------|----------------------------------------|---------------------------------------------------------------------------------------------------------------------------------------------------------------------------------------------------------------------------------------------------------------------------------------------------------------------------------------------------------------------------------------------------------------------------------------------------------------------------------------------------------------------------------------------------------------------------------------------------------------------|----|
| DRC    | 2018–2019                  | ITNs                                       | t-tests                                          | rHMIS (DHIS2)                                  | <p>‡# uncomplicated malaria cases</p> <p>‡# anemia cases</p>                                                   | Entire population, CU5, pregnant women | Monthly evolution of malaria cases in Lomami Province showed that after LLIN distribution in 2019, the number of malaria cases was lower than in 2018.                                                                                                                                                                                                                                                                                                                                                                                                                                                              | 57 |
| Kenya  | 2008–2015                  | ITNs                                       | Survival analysis                                | rHMIS (facility patient records / registries)  | ‡Incidence of malaria hospitalization                                                                          | CU5                                    | Among CU5, ITN ownership ranged between 69% and 93% during the 2008–2015 period. Among CU5 who reported using an ITN the night prior to surveys, the incidence of malaria hospitalization per 1000 child-years was 2.91 compared to 4.37 among those who did not (HR = 0.67), i.e., a 33% decrease in the incidence of malaria hospitalization.                                                                                                                                                                                                                                                                     | 58 |
| Kenya  | 2012–2015                  | ITNs                                       | Spatio-temporal Bayesian model                   | rHMIS                                          | ‡# suspected clinical malaria cases positive by microscopy                                                     | Entire population                      | Among 25,779 clinical cases, 28.7 % were positive for <i>Plasmodium</i> infection. High risk of malaria was linked to patient age, community development level and presence of rice fields; peak of malaria prevalence was recorded close to rainy seasons. Model showed that low malaria prevalence recorded during late 2012 / early 2013 was associated with large-scale ITN distribution in the study area during mid-2012.                                                                                                                                                                                     | 59 |
| Rwanda | 2019 (baseline); 2020–2022 | ITNs (PBO vs standard vs no [new] ITNs)    | Incidence rate ratio                             | rHMIS (DHIS2)                                  | <p>‡Monthly # positive uncomplicated and severe malaria cases</p> <p>‡Incidence of confirmed malaria cases</p> | Entire population                      | No differences were observed in average ITN coverage between PBO and standard ITN districts. A significant reduction in malaria incidence was reported in both PBO and two (control) standard ITN districts 1 year after ITN distribution. However, 2 years after distribution, this reduction was sustained only in PBO districts.                                                                                                                                                                                                                                                                                 | 60 |
| Uganda | 2009–2018                  | Multiple Interventions. ITNs vs IRS + ITNs | Multinomial regression models                    | rHMIS (facility patient records / registries)  | <p>‡# positive uncomplicated and severe malaria cases</p> <p>‡Incidence of confirmed malaria cases</p>         | CU5 and people over 15 yrs of age      | In 2 ITN-only sites, the proportion of malaria cases in CU5 decreased from 31 to 16% and 35 to 25%, respectively. In two sites receiving ITNs + IRS, these proportions decreased from 58 to 30% and 64 to 47%, respectively. Similarly, in ITN-only sites, the proportion of malaria cases in people > 15 years increased from 40 to 61% and 29 to 39%, respectively. In sites receiving ITNs + IRS, these proportions increased from 19 to 44% and 18 to 31%, respectively. Findings show a shift in burden of malaria from younger to older individuals after implementation of successful control interventions. | 61 |
| Uganda | 2011–2016                  | Multiple Interventions. ITNs vs IRS +      | Autoregressive integrated moving average (ARIMA) | rHMIS (facility patient records / registries), | <p>‡Test positivity rate (TRP)</p> <p>‡Incidence of confirmed uncomplicated malaria cases</p>                  | Children 6 months to 10 yrs of age     | In Walukuba, universal ITN distribution was associated with no change in malaria incidence (0.39 episodes PPY pre-intervention versus 0.20                                                                                                                                                                                                                                                                                                                                                                                                                                                                          | 62 |

|        |           |                                                   |                                    |                                                            |                                                               |                                     |                                                                                                                                                                                                                                                                                                                                                                                                                                                                                                                                                                                                                                                                                                                                                                                                                                                                                                                                                                                                                                                                                                                                                                                                                                                                                                                                                                                                                        |    |
|--------|-----------|---------------------------------------------------|------------------------------------|------------------------------------------------------------|---------------------------------------------------------------|-------------------------------------|------------------------------------------------------------------------------------------------------------------------------------------------------------------------------------------------------------------------------------------------------------------------------------------------------------------------------------------------------------------------------------------------------------------------------------------------------------------------------------------------------------------------------------------------------------------------------------------------------------------------------------------------------------------------------------------------------------------------------------------------------------------------------------------------------------------------------------------------------------------------------------------------------------------------------------------------------------------------------------------------------------------------------------------------------------------------------------------------------------------------------------------------------------------------------------------------------------------------------------------------------------------------------------------------------------------------------------------------------------------------------------------------------------------------|----|
|        |           | ITNs                                              | models                             | complemented by household and community surveys            | Human biting rate (HBR)                                       |                                     | post-intervention; adjusted rate ratio [aRR] = 1.02) and nonsignificant reductions in TPR (26.5% pre-intervention versus 26.2% post-intervention; aRR = 0.70) and HBR (1.07 mosquitoes per house-night preintervention versus 0.71 post-intervention; aRR = 0.41). In Kihikihi, over the 21-months post-ITN period, universal ITN distribution was associated with a reduction in malaria incidence (1.77 pre-intervention versus 1.89 post-intervention; aRR = 0.65), but no significant change in the TPR (49.3% pre-intervention versus 45.9% post intervention; aRR = 0.83) or HBR (4.06 pre-intervention versus 2.44 post-intervention; aRR = 0.71). In Nagongera, over the 12-month post-intervention period, universal ITN distribution was associated with a reduction in the TPR (45.3% pre-intervention versus 36.5% post-intervention; aRR = 0.82), but no significant change in malaria incidence (2.82 pre-intervention versus 3.28 post-intervention; aRR = 1.10) or HBR (41.04 pre-intervention versus 20.15 postintervention; aRR = 0.87). Addition of 3 rounds of IRS at ~6-months intervals in Nagongera was followed by clear decreases in all outcomes: incidence of malaria (3.25 pre-intervention versus 0.63 post-intervention; aRR = 0.13), TPR (37.8% pre-intervention versus 15.0% post-intervention; aRR = 0.54) and HBR (18.71 pre-intervention versus 3.23 postintervention; aRR = 0.29). |    |
| Uganda | 2012–2019 | Multiple Interventions. IRS vs ITNs vs IRS + ITNs | Interrupted time series analysis   | rHMIS (facility patient records / registries)              | Malaria TPR among febrile admissions aged 1 month to 14 years | Children 1 month to 14 years of age | Comparing intervention intervals to baseline TPR (60.3%), TPR was significantly higher during first ITN period (67.3%), and significantly lower during period when IRS was implemented using bendiocarb (43.5%) and actellic (31.3%). ITSA confirmed significant decrease in the level and trend of TPR during the IRS with the second ITN period compared to the pre-IRS (baseline $\square + \square$ first ITN) period.                                                                                                                                                                                                                                                                                                                                                                                                                                                                                                                                                                                                                                                                                                                                                                                                                                                                                                                                                                                             | 63 |
| Zambia | 2000–2016 | Multiple Interventions. IRS, ITNs, climate        | Linear and mixed regression models | rHMIS data and data from nationally-representative surveys | Incidence of confirmed uncomplicated malaria cases            | CU5 and PO5 (all ages)              | Climate variables influenced malaria substantially more than ITNs and IRS. Climate parameters are negatively impacting malaria control efforts by exacerbating the transmission conditions via more conducive temperature and rainfall environments,                                                                                                                                                                                                                                                                                                                                                                                                                                                                                                                                                                                                                                                                                                                                                                                                                                                                                                                                                                                                                                                                                                                                                                   | 64 |

|                                                   |           |                                                                     |                                                      |                                                        |                                                            |                                      | which in turn are exacerbated by cultural and socioeconomic exposure mechanisms                                                                                                                                                                                                                                                                                                                                                                                                                                                                                                                                           |    |
|---------------------------------------------------|-----------|---------------------------------------------------------------------|------------------------------------------------------|--------------------------------------------------------|------------------------------------------------------------|--------------------------------------|---------------------------------------------------------------------------------------------------------------------------------------------------------------------------------------------------------------------------------------------------------------------------------------------------------------------------------------------------------------------------------------------------------------------------------------------------------------------------------------------------------------------------------------------------------------------------------------------------------------------------|----|
| <b><i>Integrated Package of Interventions</i></b> |           |                                                                     |                                                      |                                                        |                                                            |                                      |                                                                                                                                                                                                                                                                                                                                                                                                                                                                                                                                                                                                                           |    |
| Burkina Faso                                      | 2015–2017 | Community-based health promotion, results-based financing, and IPTp | Bayesian hierarchical spatio-temporal Poisson models | rHMIS (sentinel facility patient records / registries) | # malaria cases in pregnant women                          | Pregnant women                       | Overall annual incidence increased between 2015 and 2017. Results-based financing, health promotion and IPTp-SP significantly reduced incidence of malaria in pregnant women (by 17.7%). Despite intensification of control efforts, MiP remains high at the community-scale.                                                                                                                                                                                                                                                                                                                                             | 65 |
| Ethiopia                                          | 2010–2014 | Diagnosis, treatment, ITNs                                          | Bayesian generalized Poisson spatiotemporal model.   | rHMIS (DHIS2)                                          | Incidence of confirmed uncomplicated malaria cases         | Entire population (CU5, C5-14, PO14) | Risk of malaria incidence decreased by 24% per 100 m increase in altitude. Monthly minimum temperature decreased risk of malaria by 2.2% per 1°C increment. Risk of malaria transmission was increased by 8% per 100 mm rise in the total monthly rainfall of districts. ITN coverage significantly reduced malaria risk by a factor of 0.8955.                                                                                                                                                                                                                                                                           | 66 |
| Mali                                              | 2014–2015 | IRS vs SMC vs IRS + SMC                                             | Negative binomial regression model                   | rHMIS (DHIS2)                                          | Monthly incidence of confirmed uncomplicated malaria cases | CU5 and entire population            | Cumulative peak-transmission all-ages incidence was lower in each of the intervention districts compared to control districts: 16% lower for SMC; 28% lower for IRS; and 39% lower for SMC + IRS district. Same trends were observed for CU5: incidence was 15% lower with SMC, 48% lower with IRS, and 53% lower with SMC + IRS. SMC-only intervention had a more moderate effect on incidence reduction initially, which increased over time. IRS-only intervention had a rapid, comparatively large impact initially that waned over time. The impact of the combined interventions was both rapid and longer-lasting. | 67 |
| Papa New Guinea                                   | 2010–2014 | ACTs and ITNs                                                       | Negative binomial regression models                  | rHMIS (sentinel facility patient records / registries) | Incidence of confirmed uncomplicated malaria cases         | Entire population                    | Malaria incidence initially ranged from 20 to 115/1000 population; subsequent trends varied by site. Overall, ITN distributions had a cumulative effect, reducing malaria case numbers with each round (IRR ranging from 0.12 to 0.53 in five sites). No significant reduction was associated with ACT introduction. <i>P. falciparum</i> remained the dominant parasite in all sites; resurgence occurred in one site in which a shift to early and outdoor biting of anophelines had previously been documented.                                                                                                        | 68 |
| Tanzania (Zanzibar)                               | 2000–2015 | ACTs, IRS, ITNs                                                     | Interrupted time series analysis                     | rHMIS                                                  | Monthly incidence of confirmed uncomplicated malaria cases | Entire population                    | After accounting for climate, seasonality, diagnostic testing rates, and outpatient attendance, average monthly incidence of confirmed malaria                                                                                                                                                                                                                                                                                                                                                                                                                                                                            | 69 |

|        |           |                                    |                                                      |               |                                                    |                        |                                                                                                                                                                                                                                                                                                                                                                                                                                                                                                                                                                                                                                                                                                                                                                                                                                                                                                                                                                |    |
|--------|-----------|------------------------------------|------------------------------------------------------|---------------|----------------------------------------------------|------------------------|----------------------------------------------------------------------------------------------------------------------------------------------------------------------------------------------------------------------------------------------------------------------------------------------------------------------------------------------------------------------------------------------------------------------------------------------------------------------------------------------------------------------------------------------------------------------------------------------------------------------------------------------------------------------------------------------------------------------------------------------------------------------------------------------------------------------------------------------------------------------------------------------------------------------------------------------------------------|----|
|        |           |                                    |                                                      |               |                                                    |                        | showed no trend over the pre-intervention 2000–2003 period (IRR 0.998). During the ACT-only 2003–2005 period, the average monthly malaria incidence rate declined compared to the pre-intervention period, showing an overall declining trend (IRR 0.984). There was no intercept change at the start of the ACT-only period (IRR 1.081), but a drop in intercept was identified at the start of the ACT plus vector control period (IRR 0.683). During the ACT plus vector control 2006–2015 period, the rate of decline in average monthly malaria incidence slowed compared to the ACT-only period, but the incidence rate continued to show an overall slight declining trend during 2006–2015 (IRR 0.993).                                                                                                                                                                                                                                                |    |
| Uganda | 2013–2016 | Case management and vector control | Bayesian hierarchical spatio-temporal Poisson models | rHMIS (DHIS2) | Incidence of confirmed uncomplicated malaria cases | CU5 and PO5 (all ages) | Temporal variation in incidence was similar in both age groups and depicted a steady decline up to February 2014, followed by an increase from March 2015 onwards. Trends were characterized by strong biannual seasonal pattern with two transmission seasons. Average monthly incidence in CU5 declined from 74.7 cases in 2013 to 49.4 per 1,000 in 2015, followed by an increase in 2016 of up to 51.3 cases. In PO5, a decline in incidence from 2013 to 2015 was followed by an increase in 2016. A 100% increase in ITN coverage was associated with a decline in incidence by 44% in CU5; similarly, a 100% increase in ACT coverage reduced incidence by 28% and 25% in CU5 and PO5, respectively. Space–time patterns of malaria incidence in CU5 are similar to those of parasitaemia risk predicted from the malaria indicator survey of 2014–15. Decline in malaria incidence shows effectiveness of case management with ACT and vector-control. | 70 |

558 Abbreviations: ABER, annual blood examination rate; ACT, artemisinin-combination therapies; aRR, adjusted rate ratio; C5–14, children between 5 and 14 years of age;  
559 CHW, community health worker; CU5, children under five years of age; G6PD, glucose-6-phosphate dehydrogenase; HBR, human biting rate; HMIS, health management  
560 information system; IPTp, intermittent preventive therapy; IRR, incidence rate ratio; IRS, indoor residual spraying of households with insecticide; ITN, insecticide-treated  
561 nets; ITSA, interrupted time series analysis; MBER, monthly blood examination rate; MDa, mass drug administration; MiP, malaria in pregnancy; MPI, monthly parasite

562 index; PO5, people over five years of age; PO14, people over 14 years of age; rACD, reactive case detection; RDT, rapid diagnostic test; rHMIS, routine HMIS; SMC,  
563 seasonal malaria chemoprevention; SST, single screening and treatment; TPR, test positivity rate.

564



565 **Table 2. Qualitative comparison of different analytical approaches conducted to assess interventions' effectiveness using routine HMIS and surveillance data, in**  
 566 **terms of technical and other resource requirements, as well as sustainability.**

|                                                                                         | <b>Robustness</b> | <b>Reproducibility</b> | <b>Skills Requirement</b> | <b>Software Requirement</b>                                                     | <b>Computing Requirement</b> | <b>Capacity Transferability</b> | <b>Sustainability</b> |
|-----------------------------------------------------------------------------------------|-------------------|------------------------|---------------------------|---------------------------------------------------------------------------------|------------------------------|---------------------------------|-----------------------|
| <i>Modelling</i>                                                                        |                   |                        |                           |                                                                                 |                              |                                 |                       |
| Classic statistical regression (linear models, generalized linear models, mixed models) | High              | High                   | Moderate                  | Requiring statistical software such as R language or Stata                      | Low                          | Difficult                       | Low                   |
| Interrupted time series models                                                          | High              | High                   | Advance                   | Requiring statistical software such as R language or Stata                      | Low                          | Difficult                       | Low                   |
| Bayesian spatio-temporal models                                                         | High              | High                   | Advance                   | Statistical software (e.g., R or Stata) and GIS software (e.g., QGIS or ArcGIS) | High                         | Difficult                       | Low                   |
| <i>Non-modelling</i>                                                                    |                   |                        |                           |                                                                                 |                              |                                 |                       |
| Descriptive approach                                                                    | Low               | Low                    | Low                       | Office Suites (MS Office, LiberoOffice)                                         | Low                          | Easy                            | High                  |
| Comparison of incidence trends                                                          | Moderate          | Moderate               | Moderate                  | Office Suites (MS Office, LiberoOffice)                                         | Low                          | Easy                            | High                  |
| Rate ratios                                                                             | Moderate          | Moderate               | Low                       | Office Suites (MS Office, LiberoOffice)                                         | Low                          | Easy                            | High                  |
| Difference-in-difference analysis                                                       | High              | High                   | Moderate                  | Statistical software (e.g., R or Stata)                                         | Low                          | Moderate                        | High                  |
| Compound annual growth rate                                                             | Moderate          | Moderate               | Low                       | Office Suites (MS Office, LiberoOffice)                                         | Low                          | Easy                            | High                  |

567

568

569 Robustness (Low, Moderate, High); Reproducibility (Low, Moderate, High); Skills set required (Basic, Moderate, Advanced); Software (Descriptive); Computing requirement  
570 (Low, Moderate, High); Data source (Descriptive); Capacity transferability (internal) (Easy, Moderate, Difficult); Sustainability (Low, Moderate, High).
